# Supplementary material
Source: PubMed Central journal article supplement (PMC6543201)
Supplement: nxz010_supplemental_file.pdf [file nxz010_supplemental_file.pdf]

## Supplemental Methods

### The Nurses' Health Study (NHS) and the Health Professionals Follow-Up Study (HPFS)

The NHS is a prospective cohort study of 121,700 registered female nurses aged 30 to 55 years in 1976. The HPFS is a prospective cohort of 51,529 male health professionals aged 40 to 75 years in 1986. The baseline of this analysis was defined as 1984 for the NHS and 1986 for the HPFS, with follow-up through June 2014 for and December 2014, respectively. The two cohorts have been followed via biennial mailed questionnaires that inquire about lifestyle risk factors and other exposures of interest, as well as newly diagnosed diseases and are confirmed by obtaining further data (1). The cumulative follow-up of the two cohorts exceeds 90% of potential person-time. We excluded participants who had a history of diabetes, coronary heart disease, stroke or cancer, or reported implausible dietary data (total energy intake <800 or >4200 kcal/day for men and <600 or >3500 kcal/day for women) at baseline. After exclusions, the analytical population consisted of 83,349 women and 40,741 men. Dietary information was collected with validated semi-quantitative food frequency questionnaires every 2-4 years (2). Nutrient values were calculated based on the Harvard University Food Composition Database, which is updated every four years (3). For this study, we used dietary information collected in 1984, 1986, and then every four years for a total of eight times in the NHS. In the HPFS, dietary information was first collected in 1986 and then every 4 years for a total of seven times. The end of follow-up was defined as June 2014 for the NHS and December 2014 for the HPFS. The incident cases of myocardial infarction and stroke in the NHS and HPFS were confirmed primarily through a review of medical records. Participants (or next of kin for deceased participants) reporting a primary endpoint were asked for permission to have their medical records reviewed by physicians. Myocardial infarction was confirmed based on the World Health Organization criteria (4). For incident stroke, the study physicians reviewed neuroimaging results and a stroke diagnosis was confirmed in accordance with the criteria of the National Survey of Stroke. (5) For participants who reported physician-diagnosed diabetes, a supplementary questionnaire was mailed to obtain information about symptoms, diagnostic tests and diabetes drug use. Type 2 diabetes cases before June 1998 were confirmed based on the criteria of the National Diabetes Data Group. (6) We used the diagnostic criteria from the Report of the Expert Committee on the Diagnosis and Classification of Diabetes Mellitus to define type 2 diabetes cases after June 1998. (7) We also performed systematic searches of the vital records of states and of the National Death Index, supplemented by reports from family members or postal authorities. More than 98% of the deaths in the NHS and the HPFS were identified (8). A physician reviewed death certificates and medical records to classify the cause of death according to the International Classification of Diseases-8 and 9.

### Methods for estimating dietary intake in the Global Burden of Disease study

The dietary database in the Global Burden of Disease (GBD) study were derived based on multiple sources including national availability, sales, household availability, and consumption at the individual level. The GBD study considered 24-hour diet recall as the gold-standard method for dietary assessment and adjusted dietary data from other sources to be comparable with 24-hour dietary recall data. Given that some of the sources (i.e., availability, sales, and household data) only included data for all-age groups and both sexes, the data were first split into standard age-sex groups. The GBD study estimated the global age and sex patterns of intake using data from nutrition surveys and then used that age pattern to split the availability, sales, and household data. After age-splitting, dietary data from non-gold-standard sources were matched to the dietary data from the gold-standard source (i.e., 24-hour diet recall) by age, sex, country, and year. A linear regression model was applied to estimate the consumption data from data on availability, sales, and household availability by age and sex using the following equation:

$$\text{Dietary Intake}_{a,s} = \beta * \text{Availability}_{a,s} + \text{age} + \text{sex}$$

## Supplementary data

**Supplemental Table 1.** The Alternate Healthy Eating Index scoring method.

| Component                                                                 | Criteria for minimum score (0) | Criteria for maximum score (10) |
|---------------------------------------------------------------------------|--------------------------------|---------------------------------|
| Vegetables, <sup>1</sup> <i>servings/d</i>                                | 0                              | ≥5                              |
| Fruit, <sup>2</sup> <i>servings/d</i>                                     | 0                              | ≥4                              |
| Whole grains, <sup>3</sup> <i>servings/d</i>                              | 0                              |                                 |
| Women                                                                     |                                | 5                               |
| Men                                                                       |                                | 6                               |
| Sugar-sweetened beverages and fruit juice, <sup>4</sup> <i>servings/d</i> | ≥1                             | 0                               |
| Nuts and legumes, <sup>5</sup> <i>servings/d</i>                          | 0                              | ≥1                              |
| Red/processed meat, <sup>6</sup> <i>servings/d</i>                        | ≥1.5                           | 0                               |
| <i>trans</i> Fat, % of energy                                             | ≥4                             | ≤0.5                            |
| Long-chain (n-3) fats (EPA + DHA), <i>mg/d</i>                            | 0                              | 250                             |
| PUFA, % of energy                                                         | ≤2                             | ≥10                             |
| Sodium, <i>mg/d</i>                                                       | Highest decile                 | Lowest decile                   |
| Total                                                                     | 0                              | 100                             |

Abbreviations: DHA, docosahexaenoic acid; EPA, eicosapentaenoic acid; PUFA, polyunsaturated fatty acid.

<sup>1</sup> 1 serving of vegetables equals to 65 g

<sup>2</sup> 1 serving of fruit equals to 65 g

<sup>3</sup> 1 serving of whole grains equals to 40 g (1 cup cooked) of whole-grain cereal.

<sup>4</sup> 1 serving of sugar-sweetened beverage equals to 226.8 g (8 oz).

<sup>5</sup> 1 serving of nuts and legumes equals to 50 g of nuts/legumes/seeds

<sup>6</sup> 1 serving of red and/or processed meats equals to 100 g

Supplementary data

**Supplemental Table 2.** Associations for a 10 unit increment of the Alternate Healthy Eating Index with cause-specific incidence and mortality in the Nurses' Health Study (1984-2014) and the Health Professionals Follow-Up Study (1986-2014).

|                                                                   | Male                     |         | Female            |         |
|-------------------------------------------------------------------|--------------------------|---------|-------------------|---------|
|                                                                   | RR (95% CI) <sup>1</sup> | P-value | RR (95% CI)       | P-value |
| <b>Total deaths (deaths due to injury and infection excluded)</b> |                          |         |                   |         |
| Model 1 <sup>2</sup>                                              | 0.84 (0.82, 0.85)        | <0.001  | 0.79 (0.77, 0.80) | <0.001  |
| Model 2 <sup>3</sup>                                              | 0.92 (0.91, 0.94)        | <0.001  | 0.91 (0.90, 0.93) | <0.001  |
| Model 3 <sup>4</sup>                                              | 0.91 (0.90, 0.93)        | <0.001  | 0.91 (0.90, 0.93) | <0.001  |
| <b>Cancer mortality</b>                                           |                          |         |                   |         |
| Model 1                                                           | 0.87 (0.85, 0.90)        | <0.001  | 0.87 (0.84, 0.89) | <0.001  |
| Model 2                                                           | 0.96 (0.93, 0.99)        | 0.004   | 0.97 (0.94, 0.99) | 0.017   |
| Model 3                                                           | 0.95 (0.92, 0.98)        | <0.001  | 0.96 (0.94, 0.99) | 0.014   |
| <b>Incident coronary Heart disease</b>                            |                          |         |                   |         |
| Model 1                                                           | 0.86 (0.83, 0.88)        | <0.001  | 0.81 (0.78, 0.84) | <0.001  |
| Model 2                                                           | 0.91 (0.88, 0.94)        | <0.001  | 0.90 (0.86, 0.94) | <0.001  |
| Model 3                                                           | 0.92 (0.89, 0.95)        | <0.001  | 0.90 (0.86, 0.94) | <0.001  |
| <b>Incident stroke</b>                                            |                          |         |                   |         |
| Model 1                                                           | 0.92 (0.88, 0.97)        | 0.002   | 0.88 (0.84, 0.91) | <0.001  |
| Model 2                                                           | 0.97 (0.92, 1.02)        | 0.26    | 0.94 (0.90, 0.98) | 0.007   |
| Model 3                                                           | 0.97 (0.92, 1.03)        | 0.33    | 0.94 (0.90, 0.98) | 0.007   |
| <b>Respiratory disease mortality<sup>5</sup></b>                  |                          |         |                   |         |
| Model 1                                                           | 0.81 (0.76, 0.87)        | <0.001  | 0.76 (0.69, 0.84) | <0.001  |
| Model 2                                                           | 0.91 (0.85, 0.98)        | 0.01    | 0.83 (0.75, 0.92) | <0.001  |
| Model 3                                                           | 0.89 (0.83, 0.95)        | 0.001   | 0.83 (0.75, 0.92) | <0.001  |
| <b>Neurodegenerative disease mortality</b>                        |                          |         |                   |         |
| Model 1                                                           | 0.82 (0.77, 0.88)        | <0.001  | 0.82 (0.78, 0.86) | <0.001  |
| Model 2                                                           | 0.91 (0.85, 0.97)        | 0.004   | 0.99 (0.95, 1.05) | 0.82    |
| Model 3                                                           | 0.88 (0.83, 0.94)        | <0.001  | 0.99 (0.94, 1.04) | 0.58    |
| <b>Chronic kidney disease mortality</b>                           |                          |         |                   |         |
| Model 1                                                           | 0.83 (0.73, 0.95)        | 0.005   | 0.73 (0.62, 0.86) | <0.001  |
| Model 2                                                           | 0.88 (0.77, 1.01)        | 0.07    | 0.84 (0.70, 1.00) | 0.04    |
| Model 3                                                           | 0.88 (0.77, 1.01)        | 0.06    | 0.84 (0.71, 1.00) | 0.05    |
| <b>Incident diabetes</b>                                          |                          |         |                   |         |
| Model 1                                                           | 0.84 (0.81, 0.87)        | <0.001  | 0.81 (0.79, 0.83) | <0.001  |
| Model 2                                                           | 0.88 (0.85, 0.92)        | <0.001  | 0.88 (0.86, 0.91) | <0.001  |
| Model 3                                                           | 0.92 (0.88, 0.95)        | <0.001  | 0.89 (0.86, 0.91) | <0.001  |
| <b>Digestive system disease mortality</b>                         |                          |         |                   |         |
| Model 1                                                           | 0.71 (0.64, 0.80)        | <0.001  | 0.72 (0.64, 0.80) | <0.001  |
| Model 2                                                           | 0.82 (0.73, 0.92)        | <0.001  | 0.85 (0.75, 0.95) | 0.004   |
| Model 3                                                           | 0.81 (0.73, 0.91)        | <0.001  | 0.85 (0.76, 0.95) | 0.004   |
| <b>Mortality due to other causes except injury and infection</b>  |                          |         |                   |         |
| Model 1                                                           | 0.81 (0.77, 0.85)        | <0.001  | 0.75 (0.72, 0.78) | <0.001  |
| Model 2                                                           | 0.90 (0.85, 0.94)        | <0.001  | 0.90 (0.87, 0.94) | <0.001  |
| Model 3                                                           | 0.89 (0.85, 0.93)        | <0.001  | 0.90 (0.87, 0.94) | <0.001  |

Abbreviation: RR, risk ratio.

<sup>1</sup> Values are risk ratios (95% confidence interval) of incident disease/cause-specific mortality association with 10-unit increment in the Alternate Healthy Eating Index.

<sup>2</sup> Model 1 adjusted for age (in month).

<sup>3</sup> Model 2 further adjusted for total energy intake (quintiles), Caucasian (yes vs. no), marital status (with spouse, yes or no), moderate to vigorous physical activity (0, 0-1, 1.1-3.4, 3.5-5.9, ≥6 hours per week), smoking status (never, past, current 1-14 cigarettes/d, current 15-24 cigarettes/d, current ≥25 cigarettes/d), alcohol consumption (women: 0, 0.1-4.9, 5.0-14.9, ≥15 g/d; men: 0, 0.1-4.9, 5.0-29.9, ≥30 g/d), multivitamin use (yes vs. no), current aspirin use (yes vs. no), family history of myocardial infarction (yes vs. no), family history of diabetes (yes vs. no), family history of cancer (yes vs. no), history of hypertension (yes vs. no), history of hypercholesterolemia (yes vs. no), and menopausal status and hormone use in women (premenopausal, postmenopausal never users, postmenopausal past users, postmenopausal current users).

## Supplementary data

<sup>4</sup> Model 3 further adjusted for body-mass index (<23, 23-24.9, 25-29.9, 30-34.9,  $\geq 35$  kg/m<sup>2</sup>).

<sup>5</sup> Risk ratios on respiratory disease mortality were estimated among nonsmokers only with adjustment for time since smoking cessation.

Supplementary data

**Supplemental Table 3.** Alternate Healthy Eating Index and its component scores in men and women aged 25 years or older in 190 countries/ territories in 2017.

| Countries / Territories                    | AHEI | Vegetables | Fruit | Whole grains | Sugar sweetened beverages | Nuts / legumes | Red / processed meats | trans fat | Long-chain n-3 PUFAs (DHA + EPA) | PUFAs | Sodium |
|--------------------------------------------|------|------------|-------|--------------|---------------------------|----------------|-----------------------|-----------|----------------------------------|-------|--------|
| Bermuda                                    | 67.9 | 6.3        | 9.6   | 1.4          | 2.8                       | 8.1            | 8.0                   | 10.0      | 8.0                              | 9.5   | 4.1    |
| Dominican Republic                         | 66.6 | 3.0        | 9.2   | 1.5          | 6.0                       | 9.9            | 8.6                   | 10.0      | 3.1                              | 9.8   | 5.4    |
| Israel                                     | 65.8 | 9.8        | 6.4   | 0.3          | 5.7                       | 9.7            | 7.7                   | 10.0      | 5.4                              | 8.1   | 2.6    |
| Taiwan, Province of China                  | 65.6 | 7.9        | 6.0   | 1.1          | 8.1                       | 10.0           | 6.7                   | 10.0      | 2.9                              | 10.0  | 2.9    |
| Cuba                                       | 64.8 | 7.8        | 7.5   | 1.4          | 7.5                       | 10.0           | 8.4                   | 10.0      | 2.1                              | 4.9   | 5.2    |
| Iran, Islamic Republic of                  | 63.0 | 10.0       | 6.9   | 0.1          | 7.5                       | 9.9            | 9.3                   | 8.2       | 2.2                              | 6.7   | 2.1    |
| Qatar                                      | 62.9 | 10.0       | 8.4   | 0.4          | 2.5                       | 10.0           | 7.8                   | 10.0      | 6.8                              | 6.0   | 1.1    |
| Lebanon                                    | 62.3 | 9.6        | 5.1   | 0.1          | 7.6                       | 10.0           | 8.5                   | 10.0      | 2.4                              | 6.8   | 2.2    |
| Japan                                      | 61.7 | 7.9        | 3.2   | 1.5          | 7.5                       | 9.9            | 7.6                   | 10.0      | 10.0                             | 4.0   | 0.1    |
| Turkey                                     | 61.2 | 10.0       | 6.8   | 0.1          | 7.3                       | 10.0           | 9.2                   | 10.0      | 2.2                              | 1.5   | 4.1    |
| Antigua and Barbuda                        | 60.5 | 4.3        | 7.1   | 1.1          | 4.8                       | 7.7            | 8.6                   | 10.0      | 4.3                              | 7.5   | 5.0    |
| Morocco                                    | 60.3 | 7.9        | 5.7   | 0.1          | 9.0                       | 9.7            | 9.2                   | 9.9       | 1.9                              | 4.2   | 2.6    |
| Mauritius                                  | 60.1 | 4.5        | 2.8   | 1.1          | 7.8                       | 10.0           | 9.1                   | 10.0      | 3.6                              | 10.0  | 1.2    |
| Brazil                                     | 59.7 | 3.0        | 5.8   | 1.8          | 5.9                       | 10.0           | 6.2                   | 10.0      | 4.9                              | 9.6   | 2.7    |
| Tunisia                                    | 59.5 | 10.0       | 4.2   | 0.2          | 8.4                       | 10.0           | 9.3                   | 10.0      | 1.5                              | 3.5   | 2.4    |
| Korea, Republic of                         | 59.3 | 7.6        | 5.4   | 2.1          | 7.6                       | 7.7            | 7.1                   | 9.6       | 2.4                              | 9.1   | 0.7    |
| Cape Verde                                 | 59.3 | 4.2        | 3.7   | 1.9          | 8.2                       | 9.9            | 8.2                   | 10.0      | 2.0                              | 6.5   | 4.5    |
| Korea, Democratic People's Republic of     | 59.0 | 7.0        | 2.5   | 1.8          | 9.8                       | 10.0           | 9.6                   | 10.0      | 0.4                              | 6.4   | 1.5    |
| Libyan Arab Jamahiriya                     | 58.9 | 6.4        | 3.4   | 0.2          | 8.3                       | 8.1            | 9.1                   | 9.9       | 1.5                              | 9.5   | 2.4    |
| Jordan                                     | 58.6 | 7.4        | 2.7   | 0.1          | 8.2                       | 9.5            | 9.1                   | 9.9       | 2.9                              | 6.5   | 2.3    |
| Barbados                                   | 58.5 | 3.9        | 5.1   | 0.9          | 6.0                       | 10.0           | 8.5                   | 10.0      | 3.6                              | 5.5   | 4.9    |
| Bahrain                                    | 58.4 | 9.6        | 6.0   | 0.4          | 4.6                       | 9.9            | 8.5                   | 9.9       | 3.8                              | 4.1   | 1.6    |
| Trinidad and Tobago                        | 58.1 | 2.0        | 4.1   | 0.6          | 3.8                       | 9.9            | 8.9                   | 10.0      | 4.2                              | 9.8   | 5.0    |
| Haiti                                      | 57.7 | 1.2        | 3.2   | 1.1          | 9.2                       | 10.0           | 9.4                   | 10.0      | 0.8                              | 6.5   | 6.5    |
| Paraguay                                   | 57.6 | 3.0        | 3.9   | 1.7          | 7.1                       | 9.9            | 7.2                   | 10.0      | 2.2                              | 9.5   | 3.1    |
| Guatemala                                  | 57.3 | 3.6        | 3.2   | 1.6          | 7.2                       | 10.0           | 9.2                   | 9.9       | 2.1                              | 4.8   | 5.7    |
| Grenada                                    | 57.2 | 3.5        | 5.6   | 1.0          | 6.6                       | 7.5            | 8.8                   | 10.0      | 3.1                              | 6.2   | 5.0    |
| Nepal                                      | 57.1 | 6.6        | 2.6   | 2.0          | 9.9                       | 10.0           | 9.3                   | 9.3       | 1.1                              | 4.8   | 1.4    |
| Saint Lucia                                | 56.9 | 3.4        | 5.3   | 1.0          | 6.7                       | 7.5            | 8.8                   | 10.0      | 3.0                              | 6.0   | 5.2    |
| Rwanda                                     | 56.8 | 3.0        | 7.8   | 1.1          | 9.3                       | 10.0           | 9.6                   | 10.0      | 0.3                              | 0.0   | 5.8    |
| Kuwait                                     | 56.8 | 9.4        | 3.4   | 0.8          | 3.4                       | 7.9            | 8.3                   | 9.9       | 5.1                              | 7.2   | 1.3    |
| Dominica                                   | 56.6 | 3.3        | 5.2   | 1.0          | 7.2                       | 7.4            | 8.8                   | 10.0      | 2.8                              | 5.8   | 5.2    |
| Uganda                                     | 56.6 | 1.8        | 7.2   | 1.8          | 9.3                       | 10.0           | 9.3                   | 10.0      | 0.8                              | 0.7   | 5.8    |
| Saint Vincent and the Grenadines           | 56.6 | 3.3        | 5.2   | 1.0          | 6.9                       | 7.6            | 8.9                   | 10.0      | 2.8                              | 5.8   | 5.2    |
| Cameroon                                   | 56.6 | 5.8        | 4.6   | 1.8          | 9.1                       | 10.0           | 9.3                   | 10.0      | 0.9                              | 0.0   | 5.2    |
| Suriname                                   | 56.3 | 3.2        | 4.6   | 1.6          | 5.9                       | 3.5            | 8.9                   | 10.0      | 3.4                              | 10.0  | 5.2    |
| Angola                                     | 56.2 | 4.0        | 4.1   | 1.4          | 8.0                       | 10.0           | 8.7                   | 10.0      | 2.1                              | 3.9   | 4.1    |
| Algeria                                    | 56.1 | 8.0        | 4.1   | 0.2          | 7.9                       | 7.8            | 9.2                   | 10.0      | 1.0                              | 5.5   | 2.3    |
| Egypt                                      | 55.7 | 10.0       | 5.3   | 1.3          | 8.2                       | 10.0           | 9.0                   | 6.3       | 2.3                              | 1.1   | 2.3    |
| Venezuela, Bolivarian Republic of          | 55.5 | 3.4        | 4.1   | 2.1          | 6.7                       | 7.2            | 8.0                   | 9.3       | 4.1                              | 8.1   | 2.5    |
| Macedonia, the former Yugoslav Republic of | 55.5 | 9.3        | 5.0   | 0.4          | 6.9                       | 8.8            | 8.4                   | 10.0      | 2.1                              | 3.1   | 1.6    |
| Belize                                     | 55.3 | 3.0        | 4.5   | 0.9          | 7.3                       | 7.5            | 8.9                   | 10.0      | 2.3                              | 5.3   | 5.6    |
| Viet Nam                                   | 55.2 | 8.5        | 3.4   | 2.8          | 9.2                       | 9.4            | 7.9                   | 10.0      | 2.0                              | 0.1   | 1.8    |

## Supplementary data

|                                  |      |      |     |     |     |      |     |      |     |     |     |
|----------------------------------|------|------|-----|-----|-----|------|-----|------|-----|-----|-----|
| Jamaica                          | 55.1 | 4.7  | 5.0 | 0.7 | 7.3 | 4.7  | 9.3 | 10.0 | 3.7 | 4.2 | 5.5 |
| Bahamas                          | 54.9 | 5.5  | 9.6 | 0.4 | 4.3 | 1.4  | 7.4 | 10.0 | 4.5 | 6.9 | 5.0 |
| Costa Rica                       | 54.8 | 3.0  | 5.9 | 1.0 | 5.7 | 10.0 | 8.3 | 9.2  | 2.9 | 6.3 | 2.5 |
| Senegal                          | 54.6 | 3.6  | 0.9 | 1.4 | 9.2 | 9.4  | 9.4 | 10.0 | 0.8 | 4.9 | 5.2 |
| Spain                            | 54.6 | 6.2  | 5.7 | 1.1 | 6.0 | 9.0  | 6.3 | 10.0 | 3.1 | 4.5 | 2.6 |
| United Arab Emirates             | 53.9 | 5.2  | 4.6 | 0.5 | 5.6 | 10.0 | 8.5 | 9.9  | 3.4 | 4.9 | 1.2 |
| Fiji                             | 53.9 | 2.4  | 2.0 | 0.9 | 8.9 | 9.3  | 8.6 | 10.0 | 2.4 | 5.9 | 3.5 |
| Kenya                            | 53.7 | 3.0  | 2.8 | 1.6 | 8.9 | 10.0 | 9.1 | 10.0 | 1.4 | 0.3 | 6.6 |
| Singapore                        | 53.6 | 7.0  | 4.9 | 1.9 | 7.0 | 7.1  | 7.3 | 10.0 | 4.3 | 4.0 | 0.1 |
| Malta                            | 53.5 | 9.6  | 4.4 | 0.2 | 6.4 | 6.2  | 6.6 | 10.0 | 3.3 | 4.8 | 2.0 |
| Tanzania, United Republic of     | 53.4 | 2.8  | 4.0 | 2.4 | 9.2 | 10.0 | 9.5 | 10.0 | 0.8 | 0.2 | 4.6 |
| Equatorial Guinea                | 53.4 | 5.3  | 6.9 | 1.8 | 3.5 | 10.0 | 8.0 | 10.0 | 4.0 | 0.6 | 3.3 |
| Guyana                           | 53.4 | 4.1  | 2.6 | 1.5 | 7.8 | 9.1  | 9.5 | 10.0 | 3.1 | 0.1 | 5.7 |
| Global                           | 53.4 | 5.8  | 3.6 | 1.3 | 7.8 | 9.8  | 8.0 | 10.0 | 3.9 | 2.8 | 0.4 |
| Greece                           | 53.3 | 8.9  | 6.4 | 0.2 | 7.6 | 6.0  | 6.7 | 10.0 | 2.2 | 2.8 | 2.6 |
| Nigeria                          | 52.9 | 4.3  | 3.2 | 1.3 | 8.4 | 10.0 | 9.4 | 10.0 | 0.4 | 0.0 | 5.9 |
| Italy                            | 52.8 | 6.4  | 6.1 | 0.0 | 7.4 | 5.9  | 6.4 | 10.0 | 2.6 | 5.7 | 2.2 |
| Bosnia and Herzegovina           | 52.8 | 9.5  | 4.0 | 1.6 | 7.7 | 7.3  | 8.8 | 10.0 | 1.7 | 0.7 | 1.6 |
| El Salvador                      | 52.6 | 4.0  | 3.7 | 1.6 | 7.2 | 10.0 | 9.2 | 9.5  | 2.1 | 2.6 | 2.7 |
| Gabon                            | 52.5 | 2.7  | 7.1 | 2.1 | 6.4 | 9.3  | 8.8 | 10.0 | 2.6 | 0.0 | 3.6 |
| Montenegro                       | 52.4 | 10.0 | 7.6 | 0.5 | 6.7 | 5.5  | 6.5 | 10.0 | 2.3 | 1.9 | 1.5 |
| Lao People's Democratic Republic | 52.4 | 7.6  | 3.6 | 3.2 | 9.1 | 6.7  | 8.8 | 10.0 | 1.4 | 0.0 | 2.0 |
| Malawi                           | 52.4 | 1.4  | 3.0 | 2.5 | 9.6 | 10.0 | 9.6 | 10.0 | 0.4 | 0.0 | 5.9 |
| Guinea                           | 52.4 | 3.1  | 4.3 | 1.8 | 9.4 | 8.4  | 9.5 | 10.0 | 0.5 | 0.0 | 5.4 |
| Panama                           | 52.2 | 1.8  | 4.6 | 2.3 | 4.6 | 8.2  | 7.8 | 9.5  | 3.8 | 7.1 | 2.4 |
| Sierra Leone                     | 52.2 | 3.4  | 1.8 | 1.7 | 9.4 | 10.0 | 9.7 | 10.0 | 0.6 | 0.0 | 5.4 |
| Serbia                           | 51.8 | 6.4  | 4.4 | 0.7 | 7.0 | 9.5  | 7.7 | 10.0 | 2.5 | 1.9 | 1.6 |
| Myanmar                          | 51.7 | 5.1  | 2.1 | 2.3 | 9.2 | 10.0 | 9.0 | 10.0 | 2.2 | 0.0 | 1.8 |
| Ghana                            | 51.7 | 2.3  | 8.0 | 1.2 | 8.8 | 8.4  | 9.6 | 10.0 | 1.1 | 0.0 | 2.2 |
| Seychelles                       | 51.5 | 5.8  | 4.8 | 2.1 | 6.9 | 8.6  | 8.6 | 10.0 | 1.7 | 0.2 | 2.7 |
| India                            | 51.4 | 5.7  | 2.9 | 1.3 | 9.7 | 10.0 | 9.8 | 9.3  | 0.6 | 0.2 | 2.0 |
| Iraq                             | 51.4 | 9.0  | 2.1 | 0.4 | 7.8 | 4.8  | 9.6 | 9.9  | 1.4 | 4.1 | 2.2 |
| Albania                          | 51.4 | 10.0 | 6.3 | 0.1 | 7.4 | 5.7  | 7.8 | 10.0 | 2.5 | 0.2 | 1.6 |
| Andorra                          | 51.3 | 7.6  | 6.3 | 0.8 | 4.2 | 5.2  | 5.6 | 10.0 | 4.7 | 4.7 | 2.1 |
| Mozambique                       | 51.2 | 1.2  | 1.3 | 1.2 | 9.5 | 10.0 | 9.5 | 10.0 | 0.3 | 2.0 | 6.1 |
| Norway                           | 51.1 | 4.1  | 6.0 | 1.0 | 5.8 | 5.8  | 4.8 | 10.0 | 3.5 | 8.4 | 1.7 |
| Benin                            | 50.9 | 2.5  | 1.8 | 1.7 | 9.3 | 10.0 | 9.6 | 10.0 | 1.0 | 0.0 | 5.0 |
| Belgium                          | 50.9 | 6.8  | 3.9 | 0.9 | 5.9 | 3.4  | 6.3 | 9.9  | 3.3 | 7.3 | 3.2 |
| South Sudan                      | 50.8 | 2.3  | 2.2 | 1.7 | 9.0 | 10.0 | 9.2 | 10.0 | 0.8 | 0.0 | 5.6 |
| Peru                             | 50.7 | 3.4  | 4.9 | 1.6 | 6.6 | 9.1  | 9.3 | 9.3  | 1.6 | 1.9 | 2.9 |
| Mali                             | 50.6 | 3.6  | 1.5 | 1.5 | 9.3 | 10.0 | 8.8 | 10.0 | 0.7 | 0.0 | 5.3 |
| Colombia                         | 50.6 | 2.4  | 5.9 | 1.5 | 6.3 | 8.3  | 8.4 | 9.8  | 3.1 | 3.3 | 1.4 |
| Mauritania                       | 50.4 | 1.4  | 0.7 | 0.5 | 8.9 | 10.0 | 8.7 | 10.0 | 0.9 | 4.5 | 4.9 |
| Portugal                         | 50.4 | 8.2  | 4.9 | 0.8 | 7.3 | 4.1  | 6.2 | 10.0 | 2.9 | 3.7 | 2.2 |
| Canada                           | 50.3 | 5.9  | 5.9 | 1.3 | 3.6 | 10.0 | 6.0 | 8.1  | 6.0 | 1.7 | 1.7 |
| Greenland                        | 50.2 | 6.8  | 5.8 | 1.3 | 2.7 | 6.1  | 4.9 | 9.1  | 6.4 | 6.1 | 1.0 |
| Nicaragua                        | 50.1 | 0.7  | 2.2 | 1.9 | 8.1 | 10.0 | 9.4 | 9.5  | 1.8 | 3.5 | 3.0 |

## Supplementary data

|                                 |      |      |     |     |     |      |     |      |     |      |     |
|---------------------------------|------|------|-----|-----|-----|------|-----|------|-----|------|-----|
| Comoros                         | 50.0 | 1.6  | 1.6 | 1.3 | 9.4 | 9.8  | 9.4 | 10.0 | 1.2 | 0.0  | 5.7 |
| Zimbabwe                        | 49.9 | 1.0  | 0.8 | 2.0 | 9.2 | 7.3  | 9.2 | 10.0 | 1.0 | 5.6  | 3.8 |
| Djibouti                        | 49.9 | 3.5  | 0.9 | 0.7 | 9.0 | 8.7  | 8.9 | 10.0 | 0.9 | 1.7  | 5.6 |
| South Africa                    | 49.9 | 2.6  | 1.7 | 2.5 | 7.0 | 4.5  | 8.1 | 10.0 | 3.5 | 6.1  | 3.9 |
| United States                   | 49.8 | 6.1  | 4.7 | 1.3 | 2.2 | 6.7  | 5.2 | 8.1  | 4.6 | 10.0 | 0.9 |
| Sao Tome and Principe           | 49.8 | 2.7  | 1.8 | 1.3 | 9.0 | 9.7  | 9.3 | 10.0 | 0.8 | 0.0  | 5.1 |
| Niger                           | 49.8 | 3.0  | 1.1 | 1.0 | 9.6 | 10.0 | 8.9 | 10.0 | 0.5 | 0.0  | 5.6 |
| Syrian Arab Republic            | 49.5 | 4.9  | 2.6 | 0.2 | 9.2 | 6.4  | 9.3 | 9.9  | 0.8 | 3.5  | 2.7 |
| Honduras                        | 49.5 | 3.1  | 3.5 | 1.7 | 8.0 | 9.6  | 9.1 | 9.5  | 2.1 | 0.0  | 3.0 |
| Eritrea                         | 49.5 | 1.5  | 1.4 | 1.5 | 9.5 | 9.6  | 9.5 | 10.0 | 0.4 | 0.0  | 6.0 |
| Zambia                          | 49.4 | 1.8  | 0.5 | 2.4 | 8.8 | 10.0 | 9.4 | 10.0 | 0.7 | 0.2  | 5.5 |
| New Zealand                     | 49.4 | 6.0  | 4.9 | 1.2 | 7.6 | 6.1  | 5.5 | 9.8  | 3.9 | 3.1  | 1.4 |
| Bulgaria                        | 49.4 | 9.8  | 2.4 | 0.8 | 6.4 | 3.8  | 6.4 | 10.0 | 2.4 | 5.9  | 1.4 |
| Bhutan                          | 49.3 | 3.9  | 2.4 | 1.9 | 9.7 | 9.4  | 9.4 | 9.4  | 1.1 | 1.0  | 1.1 |
| Oman                            | 49.3 | 6.8  | 9.5 | 0.9 | 4.3 | 5.2  | 8.2 | 9.9  | 3.0 | 0.0  | 1.6 |
| Togo                            | 48.9 | 1.7  | 0.5 | 1.5 | 9.5 | 10.0 | 9.6 | 10.0 | 0.6 | 0.0  | 5.4 |
| Armenia                         | 48.7 | 10.0 | 4.1 | 0.1 | 8.4 | 0.6  | 8.3 | 10.0 | 2.7 | 2.7  | 1.9 |
| Malaysia                        | 48.6 | 3.7  | 3.6 | 1.4 | 7.9 | 5.2  | 9.0 | 10.0 | 3.8 | 2.7  | 1.4 |
| Lithuania                       | 48.5 | 6.4  | 3.5 | 1.1 | 8.0 | 5.1  | 6.3 | 9.5  | 3.7 | 2.7  | 2.2 |
| Denmark                         | 48.4 | 6.1  | 6.1 | 0.7 | 6.5 | 2.3  | 6.4 | 10.0 | 4.6 | 2.2  | 3.5 |
| Sudan                           | 48.4 | 4.7  | 2.3 | 0.2 | 9.2 | 7.8  | 9.4 | 9.9  | 0.9 | 1.3  | 2.6 |
| Burundi                         | 48.2 | 1.3  | 1.2 | 0.7 | 9.6 | 9.4  | 9.5 | 10.0 | 0.1 | 0.0  | 6.3 |
| Bolivia, Plurinational State of | 48.2 | 2.2  | 3.6 | 1.3 | 7.3 | 5.4  | 7.9 | 9.0  | 3.6 | 4.8  | 3.1 |
| Timor-Leste                     | 47.9 | 2.0  | 1.0 | 2.2 | 9.3 | 10.0 | 9.2 | 10.0 | 2.2 | 0.0  | 1.9 |
| Somalia                         | 47.9 | 1.1  | 1.1 | 0.8 | 9.8 | 8.8  | 9.6 | 10.0 | 0.3 | 0.0  | 6.5 |
| Thailand                        | 47.9 | 2.8  | 5.9 | 2.5 | 6.9 | 5.4  | 9.0 | 10.0 | 2.4 | 1.7  | 1.1 |
| Cambodia                        | 47.9 | 2.3  | 1.5 | 3.2 | 9.4 | 9.5  | 9.1 | 10.0 | 0.7 | 0.0  | 2.1 |
| Samoa                           | 47.9 | 2.3  | 3.1 | 0.9 | 9.3 | 4.7  | 8.7 | 10.0 | 1.4 | 0.4  | 7.2 |
| Ethiopia                        | 47.8 | 1.3  | 0.5 | 0.8 | 9.4 | 10.0 | 9.5 | 10.0 | 0.3 | 0.0  | 6.0 |
| Ecuador                         | 47.8 | 2.8  | 7.5 | 1.2 | 4.8 | 3.5  | 7.4 | 8.6  | 3.0 | 6.0  | 2.9 |
| Cyprus                          | 47.7 | 5.2  | 4.1 | 0.4 | 6.3 | 4.7  | 7.0 | 10.0 | 2.4 | 5.0  | 2.5 |
| Ukraine                         | 47.7 | 8.2  | 2.1 | 0.5 | 9.3 | 2.5  | 8.3 | 10.0 | 2.5 | 1.6  | 2.7 |
| Mexico                          | 47.7 | 3.7  | 4.9 | 3.9 | 0.9 | 10.0 | 7.3 | 7.1  | 3.3 | 3.2  | 3.5 |
| Maldives                        | 47.5 | 4.7  | 4.8 | 0.8 | 7.6 | 6.1  | 9.4 | 10.0 | 2.2 | 0.1  | 1.9 |
| United Kingdom                  | 47.5 | 5.0  | 4.1 | 0.8 | 6.2 | 4.0  | 6.8 | 9.9  | 3.4 | 3.7  | 3.3 |
| Netherlands                     | 47.3 | 4.5  | 5.6 | 1.1 | 5.6 | 3.6  | 6.2 | 9.3  | 2.7 | 5.6  | 3.0 |
| Burkina Faso                    | 47.3 | 1.3  | 0.3 | 1.1 | 9.4 | 10.0 | 9.1 | 10.0 | 0.7 | 0.0  | 5.3 |
| France                          | 47.3 | 4.9  | 4.6 | 0.3 | 7.1 | 3.5  | 6.1 | 10.0 | 3.1 | 5.1  | 2.7 |
| Lesotho                         | 47.2 | 1.4  | 0.9 | 2.9 | 8.9 | 9.2  | 9.2 | 10.0 | 0.9 | 0.0  | 3.9 |
| Belarus                         | 47.2 | 8.6  | 3.4 | 0.3 | 8.6 | 1.4  | 6.4 | 10.0 | 3.4 | 2.8  | 2.3 |
| China                           | 47.1 | 7.3  | 3.2 | 1.1 | 8.8 | 4.8  | 7.0 | 10.0 | 1.7 | 3.0  | 0.0 |
| Hungary                         | 47.0 | 7.6  | 3.4 | 0.8 | 6.4 | 4.3  | 7.0 | 9.8  | 2.8 | 3.8  | 1.2 |
| Palestine                       | 46.9 | 4.7  | 2.5 | 0.3 | 9.2 | 6.2  | 9.3 | 9.9  | 1.0 | 0.8  | 2.8 |
| Ireland                         | 46.8 | 5.2  | 5.7 | 2.1 | 5.1 | 4.6  | 5.4 | 10.0 | 3.8 | 2.8  | 2.3 |
| Australia                       | 46.8 | 5.0  | 4.4 | 1.4 | 6.4 | 5.0  | 5.3 | 9.7  | 4.7 | 1.4  | 3.5 |
| Solomon Islands                 | 46.7 | 1.0  | 2.8 | 1.2 | 9.6 | 7.5  | 9.3 | 10.0 | 0.7 | 0.0  | 4.7 |
| Congo                           | 46.7 | 2.4  | 3.0 | 1.6 | 8.2 | 6.6  | 9.5 | 10.0 | 1.2 | 0.0  | 4.2 |

## Supplementary data

|                                       |      |      |     |     |     |      |     |      |     |     |     |
|---------------------------------------|------|------|-----|-----|-----|------|-----|------|-----|-----|-----|
| Moldova, Republic of                  | 46.6 | 6.1  | 2.1 | 1.2 | 9.5 | 1.7  | 8.6 | 9.9  | 1.8 | 2.6 | 3.1 |
| Gambia                                | 46.6 | 2.1  | 0.4 | 1.6 | 9.4 | 6.5  | 9.7 | 10.0 | 0.4 | 1.1 | 5.4 |
| Sri Lanka                             | 46.5 | 2.6  | 2.0 | 1.9 | 8.6 | 9.1  | 9.8 | 10.0 | 1.3 | 0.0 | 1.3 |
| Indonesia                             | 46.5 | 2.6  | 3.5 | 2.6 | 9.6 | 5.8  | 9.6 | 10.0 | 1.0 | 0.2 | 1.6 |
| Congo, the Democratic Republic of the | 46.5 | 1.1  | 1.5 | 1.6 | 9.7 | 5.9  | 9.5 | 10.0 | 0.4 | 0.0 | 6.8 |
| Russian Federation                    | 46.5 | 5.8  | 3.3 | 0.8 | 8.2 | 2.6  | 7.2 | 10.0 | 3.6 | 2.7 | 2.4 |
| Central African Republic              | 46.2 | 1.1  | 1.9 | 1.2 | 9.7 | 7.6  | 8.4 | 10.0 | 0.9 | 0.0 | 5.3 |
| Estonia                               | 46.1 | 6.1  | 3.7 | 1.2 | 8.0 | 4.7  | 7.1 | 9.1  | 2.9 | 1.2 | 2.2 |
| Côte d'Ivoire                         | 45.8 | 2.6  | 3.6 | 1.1 | 8.9 | 6.6  | 9.6 | 10.0 | 0.5 | 0.0 | 3.0 |
| Guinea-Bissau                         | 45.8 | 1.3  | 2.3 | 2.0 | 9.5 | 4.9  | 9.0 | 10.0 | 0.5 | 0.9 | 5.5 |
| Liberia                               | 45.7 | 1.8  | 2.1 | 1.4 | 9.6 | 4.2  | 9.7 | 10.0 | 0.9 | 0.0 | 5.9 |
| Madagascar                            | 45.7 | 1.1  | 2.2 | 2.2 | 9.5 | 4.5  | 9.3 | 10.0 | 0.9 | 0.0 | 6.0 |
| Botswana                              | 45.6 | 2.2  | 2.5 | 1.6 | 5.8 | 8.8  | 9.0 | 10.0 | 1.0 | 1.7 | 3.2 |
| Romania                               | 45.6 | 10.0 | 3.6 | 1.3 | 6.0 | 2.9  | 6.6 | 10.0 | 2.0 | 1.9 | 1.3 |
| Austria                               | 45.5 | 5.3  | 5.9 | 1.5 | 6.5 | 4.3  | 4.7 | 10.0 | 3.2 | 1.8 | 2.3 |
| Chad                                  | 45.4 | 0.6  | 0.5 | 0.1 | 9.3 | 10.0 | 9.2 | 10.0 | 0.4 | 0.0 | 5.3 |
| Saudi Arabia                          | 45.4 | 5.5  | 3.7 | 0.8 | 3.1 | 6.2  | 9.1 | 10.0 | 4.3 | 1.3 | 1.5 |
| Swaziland                             | 45.2 | 1.2  | 3.6 | 2.5 | 7.5 | 7.2  | 8.6 | 10.0 | 1.2 | 0.0 | 3.5 |
| Uruguay                               | 45.1 | 3.3  | 4.3 | 0.3 | 4.3 | 3.4  | 6.8 | 10.0 | 3.6 | 7.2 | 1.9 |
| Iceland                               | 45.1 | 4.1  | 5.7 | 0.9 | 5.0 | 1.2  | 6.4 | 10.0 | 4.1 | 4.1 | 3.4 |
| Kyrgyzstan                            | 45.1 | 8.8  | 1.7 | 0.1 | 9.2 | 3.3  | 8.2 | 10.0 | 1.2 | 0.2 | 2.5 |
| Croatia                               | 45.0 | 4.7  | 4.7 | 1.0 | 5.8 | 2.6  | 7.4 | 10.0 | 1.4 | 6.0 | 1.4 |
| Luxembourg                            | 45.0 | 5.5  | 8.4 | 1.3 | 3.0 | 2.5  | 5.1 | 10.0 | 4.0 | 3.2 | 2.0 |
| Tajikistan                            | 44.6 | 8.6  | 1.2 | 0.0 | 9.3 | 1.8  | 9.2 | 10.0 | 1.0 | 0.9 | 2.6 |
| Slovenia                              | 44.5 | 4.4  | 5.9 | 1.4 | 4.5 | 4.0  | 6.4 | 8.6  | 3.4 | 4.7 | 1.3 |
| Germany                               | 44.5 | 4.8  | 3.7 | 1.4 | 5.9 | 3.1  | 5.9 | 9.8  | 2.6 | 4.7 | 2.5 |
| Namibia                               | 44.4 | 2.0  | 1.3 | 1.6 | 6.9 | 8.4  | 8.7 | 10.0 | 1.8 | 0.3 | 3.3 |
| Kazakhstan                            | 44.3 | 9.9  | 2.0 | 0.1 | 6.1 | 1.1  | 6.7 | 10.0 | 3.2 | 3.6 | 1.6 |
| Bangladesh                            | 44.1 | 1.8  | 1.3 | 3.0 | 9.9 | 6.9  | 9.8 | 9.4  | 0.3 | 0.6 | 1.3 |
| Sweden                                | 43.9 | 4.7  | 5.4 | 0.9 | 6.1 | 3.8  | 5.4 | 10.0 | 4.4 | 1.9 | 1.4 |
| Latvia                                | 43.9 | 6.5  | 2.6 | 0.8 | 8.2 | 1.3  | 6.9 | 6.4  | 5.1 | 3.9 | 2.2 |
| Chile                                 | 43.8 | 6.1  | 3.6 | 0.7 | 3.8 | 4.5  | 6.0 | 10.0 | 3.9 | 3.3 | 1.8 |
| Uzbekistan                            | 43.7 | 10.0 | 2.5 | 0.0 | 8.5 | 0.6  | 7.9 | 10.0 | 1.7 | 0.3 | 2.1 |
| Tonga                                 | 43.7 | 2.5  | 3.4 | 0.9 | 9.2 | 3.6  | 8.7 | 10.0 | 1.6 | 0.1 | 3.6 |
| Philippines                           | 43.6 | 4.1  | 5.4 | 2.4 | 6.9 | 2.7  | 8.4 | 10.0 | 1.8 | 0.0 | 1.8 |
| Yemen                                 | 43.6 | 2.0  | 2.1 | 0.1 | 9.3 | 6.8  | 9.5 | 9.9  | 0.9 | 0.0 | 2.9 |
| Marshall Islands                      | 43.3 | 2.1  | 2.9 | 0.9 | 9.4 | 3.4  | 8.8 | 10.0 | 1.3 | 0.0 | 4.5 |
| Vanuatu                               | 43.2 | 1.8  | 2.3 | 0.8 | 9.5 | 4.6  | 8.9 | 10.0 | 0.9 | 0.1 | 4.2 |
| Slovakia                              | 43.0 | 5.8  | 3.3 | 0.9 | 6.5 | 3.0  | 6.8 | 9.4  | 2.3 | 3.8 | 1.3 |
| Argentina                             | 42.9 | 4.1  | 5.4 | 0.7 | 3.9 | 1.4  | 5.3 | 10.0 | 5.4 | 4.0 | 2.6 |
| Kiribati                              | 42.9 | 1.5  | 1.9 | 0.7 | 9.7 | 4.7  | 9.1 | 10.0 | 0.7 | 0.0 | 4.6 |
| Micronesia, Federated States of       | 42.8 | 2.0  | 2.8 | 0.8 | 9.5 | 3.3  | 8.9 | 10.0 | 1.2 | 0.0 | 4.2 |
| Switzerland                           | 42.4 | 5.2  | 4.4 | 0.5 | 6.5 | 3.8  | 6.2 | 9.7  | 2.3 | 1.7 | 2.2 |
| Azerbaijan                            | 42.2 | 9.8  | 3.6 | 0.1 | 7.0 | 1.1  | 8.5 | 8.7  | 1.7 | 0.0 | 1.8 |
| Brunei Darussalam                     | 42.2 | 3.6  | 3.8 | 1.5 | 4.9 | 5.2  | 8.4 | 10.0 | 4.7 | 0.0 | 0.2 |
| Poland                                | 42.1 | 7.5  | 2.8 | 1.0 | 5.6 | 2.7  | 6.5 | 10.0 | 3.3 | 1.1 | 1.5 |
| Papua New Guinea                      | 41.7 | 1.7  | 2.4 | 0.6 | 9.5 | 3.0  | 9.0 | 10.0 | 0.7 | 0.0 | 4.7 |



## Supplementary data

|                |      |     |     |     |     |     |     |      |     |     |     |
|----------------|------|-----|-----|-----|-----|-----|-----|------|-----|-----|-----|
| Finland        | 41.4 | 4.4 | 4.1 | 1.1 | 6.7 | 2.4 | 6.7 | 10.0 | 3.2 | 0.4 | 2.6 |
| Turkmenistan   | 41.2 | 9.7 | 3.5 | 0.1 | 7.0 | 0.8 | 6.2 | 10.0 | 2.2 | 0.0 | 1.7 |
| Pakistan       | 40.8 | 1.7 | 1.5 | 0.2 | 9.8 | 6.9 | 9.2 | 9.2  | 1.1 | 0.0 | 1.2 |
| Georgia        | 40.5 | 4.3 | 2.3 | 0.1 | 8.4 | 1.1 | 8.7 | 9.8  | 1.8 | 2.2 | 1.9 |
| Czech Republic | 40.2 | 4.1 | 3.4 | 1.9 | 4.7 | 4.0 | 6.7 | 10.0 | 2.7 | 1.6 | 1.2 |
| Afghanistan    | 39.5 | 2.2 | 1.4 | 0.1 | 9.6 | 3.2 | 9.3 | 9.9  | 0.5 | 0.0 | 3.2 |
| Mongolia       | 34.0 | 3.1 | 1.4 | 0.1 | 7.8 | 1.0 | 5.6 | 10.0 | 1.4 | 1.7 | 2.0 |

---

Supplementary data

**Supplemental Table 4.** Alternate Healthy Eating Index and its component scores in men and women aged 25 years or older in 190 countries/ territories in 1990.

| Countries/ Territories                 | AHEI | Vegetables | Fruit | Whole grains | Sugar sweetened beverages | Nuts / legumes | Red / processed meats | trans fat | Long-chain n-3 PUFAs (DHA + EPA) | PUFAs | Sodium |
|----------------------------------------|------|------------|-------|--------------|---------------------------|----------------|-----------------------|-----------|----------------------------------|-------|--------|
| Lebanon                                | 71.0 | 10.0       | 8.7   | 0.1          | 8.5                       | 10.0           | 8.9                   | 10.0      | 2.4                              | 10.0  | 2.5    |
| Israel                                 | 65.5 | 9.9        | 6.7   | 0.2          | 6.6                       | 9.7            | 8.6                   | 10.0      | 3.4                              | 7.4   | 2.8    |
| Dominican Republic                     | 63.1 | 1.8        | 6.8   | 1.2          | 7.9                       | 10.0           | 9.1                   | 10.0      | 1.6                              | 9.2   | 5.5    |
| Bermuda                                | 62.8 | 4.9        | 8.7   | 1.3          | 3.6                       | 8.2            | 8.1                   | 10.0      | 5.6                              | 8.1   | 4.2    |
| Taiwan, Province of China              | 62.7 | 6.5        | 4.4   | 1.3          | 9.0                       | 10.0           | 7.4                   | 10.0      | 2.2                              | 10.0  | 2.0    |
| Japan                                  | 60.9 | 6.9        | 2.7   | 2.1          | 7.6                       | 10.0           | 8.1                   | 10.0      | 10.0                             | 3.5   | 0.0    |
| Turkey                                 | 59.2 | 10.0       | 5.4   | 0.1          | 8.2                       | 10.0           | 9.2                   | 10.0      | 1.0                              | 0.1   | 5.2    |
| Tunisia                                | 58.6 | 8.9        | 3.1   | 0.2          | 9.0                       | 8.3            | 9.2                   | 10.0      | 1.0                              | 6.1   | 2.8    |
| Cyprus                                 | 58.4 | 6.7        | 5.6   | 0.4          | 7.3                       | 7.0            | 6.8                   | 9.8       | 2.5                              | 9.5   | 2.7    |
| Libyan Arab Jamahiriya                 | 58.4 | 9.2        | 4.8   | 0.2          | 6.4                       | 9.4            | 8.7                   | 9.3       | 1.7                              | 6.6   | 2.1    |
| Korea, Democratic People's Republic of | 58.2 | 9.5        | 2.6   | 1.9          | 9.5                       | 10.0           | 9.3                   | 10.0      | 0.6                              | 4.8   | 0.0    |
| Bahamas                                | 58.1 | 7.7        | 6.7   | 0.6          | 4.3                       | 4.1            | 6.1                   | 10.0      | 3.9                              | 9.9   | 4.8    |
| United Arab Emirates                   | 58.0 | 10.0       | 6.0   | 0.4          | 3.2                       | 10.0           | 7.4                   | 9.4       | 3.8                              | 6.5   | 1.4    |
| Qatar                                  | 57.9 | 10.0       | 7.0   | 0.3          | 3.2                       | 10.0           | 8.0                   | 9.4       | 4.4                              | 4.0   | 1.5    |
| Trinidad and Tobago                    | 57.6 | 1.7        | 3.2   | 0.7          | 5.7                       | 10.0           | 9.2                   | 10.0      | 1.9                              | 9.8   | 5.4    |
| Brazil                                 | 57.2 | 1.9        | 4.4   | 1.4          | 6.9                       | 10.0           | 7.7                   | 9.9       | 2.5                              | 10.0  | 2.6    |
| Korea, Republic of                     | 57.1 | 10.0       | 2.4   | 2.8          | 9.4                       | 10.0           | 8.5                   | 9.2       | 1.1                              | 3.2   | 0.5    |
| Haiti                                  | 56.6 | 2.2        | 4.6   | 0.8          | 9.2                       | 10.0           | 9.5                   | 10.0      | 0.5                              | 3.7   | 6.0    |
| Antigua and Barbuda                    | 56.0 | 3.3        | 5.7   | 1.0          | 6.2                       | 7.8            | 8.7                   | 10.0      | 2.9                              | 5.7   | 4.7    |
| Malta                                  | 55.9 | 6.9        | 3.6   | 0.2          | 8.0                       | 7.2            | 6.8                   | 9.8       | 2.3                              | 8.4   | 2.6    |
| Guinea                                 | 55.8 | 4.5        | 5.4   | 1.6          | 9.4                       | 9.3            | 9.7                   | 10.0      | 0.2                              | 0.0   | 5.6    |
| Fiji                                   | 55.7 | 1.4        | 1.0   | 0.8          | 9.2                       | 8.6            | 8.2                   | 10.0      | 1.3                              | 9.6   | 5.7    |
| Cameroon                               | 55.2 | 2.9        | 5.6   | 1.5          | 9.0                       | 10.0           | 9.3                   | 10.0      | 1.6                              | 0.0   | 5.4    |
| Uganda                                 | 55.1 | 1.3        | 9.0   | 1.6          | 9.6                       | 10.0           | 9.4                   | 10.0      | 0.7                              | 0.0   | 3.4    |
| Bahrain                                | 55.0 | 9.5        | 5.1   | 0.3          | 5.3                       | 9.7            | 8.5                   | 9.3       | 2.6                              | 2.6   | 1.9    |
| Barbados                               | 54.2 | 2.6        | 3.4   | 0.9          | 6.2                       | 9.7            | 7.6                   | 10.0      | 3.6                              | 5.7   | 4.5    |
| Italy                                  | 54.2 | 9.0        | 5.6   | 0.1          | 7.7                       | 5.7            | 6.3                   | 10.0      | 2.9                              | 4.6   | 2.4    |
| Mauritius                              | 54.0 | 2.4        | 0.9   | 1.2          | 8.8                       | 10.0           | 9.2                   | 10.0      | 1.3                              | 10.0  | 0.1    |
| Saint Lucia                            | 53.9 | 2.7        | 4.5   | 1.0          | 7.3                       | 7.8            | 8.9                   | 10.0      | 2.1                              | 4.6   | 5.1    |
| Cuba                                   | 53.8 | 3.1        | 4.1   | 1.0          | 8.0                       | 10.0           | 8.8                   | 10.0      | 1.5                              | 2.0   | 5.2    |
| Spain                                  | 53.7 | 8.7        | 4.8   | 0.8          | 6.9                       | 7.1            | 6.1                   | 10.0      | 2.8                              | 3.2   | 3.3    |
| Rwanda                                 | 53.7 | 1.5        | 8.5   | 1.0          | 9.6                       | 10.0           | 9.8                   | 10.0      | 0.1                              | 0.0   | 3.3    |
| Greece                                 | 53.7 | 10.0       | 6.6   | 0.1          | 7.6                       | 6.8            | 6.7                   | 9.6       | 2.2                              | 1.1   | 2.9    |
| Kuwait                                 | 53.5 | 9.7        | 3.8   | 0.7          | 4.6                       | 6.9            | 8.2                   | 9.3       | 2.8                              | 6.2   | 1.4    |
| Guatemala                              | 53.4 | 2.5        | 2.4   | 2.0          | 8.0                       | 10.0           | 9.5                   | 9.8       | 1.0                              | 0.7   | 7.4    |
| Dominica                               | 53.1 | 2.5        | 4.2   | 0.9          | 7.8                       | 7.8            | 9.0                   | 10.0      | 1.8                              | 4.3   | 4.9    |
| Jordan                                 | 53.1 | 6.4        | 3.0   | 0.1          | 8.7                       | 8.8            | 9.2                   | 9.3       | 2.2                              | 2.7   | 2.7    |
| Iran, Islamic Republic of              | 52.9 | 7.9        | 5.0   | 0.1          | 8.6                       | 7.2            | 9.2                   | 5.4       | 1.0                              | 6.0   | 2.6    |
| Grenada                                | 52.7 | 2.4        | 3.9   | 0.9          | 8.0                       | 7.6            | 9.0                   | 10.0      | 1.7                              | 4.1   | 5.1    |
| Saint Vincent and the Grenadines       | 52.4 | 2.3        | 3.8   | 0.9          | 7.9                       | 7.6            | 9.0                   | 10.0      | 1.6                              | 3.9   | 5.3    |
| Suriname                               | 52.4 | 2.9        | 3.1   | 1.7          | 7.0                       | 5.3            | 9.1                   | 10.0      | 2.4                              | 5.8   | 5.1    |
| Senegal                                | 52.3 | 1.7        | 0.6   | 1.0          | 9.3                       | 9.8            | 9.4                   | 10.0      | 0.5                              | 4.5   | 5.6    |

## Supplementary data

|                                            |      |     |     |     |     |      |     |      |     |     |     |
|--------------------------------------------|------|-----|-----|-----|-----|------|-----|------|-----|-----|-----|
| Paraguay                                   | 52.3 | 3.4 | 5.0 | 1.5 | 8.0 | 10.0 | 6.1 | 9.7  | 2.1 | 3.7 | 2.8 |
| Belize                                     | 52.2 | 2.2 | 3.5 | 0.8 | 8.3 | 7.7  | 9.1 | 10.0 | 1.5 | 3.7 | 5.4 |
| Gabon                                      | 52.2 | 2.3 | 8.0 | 2.0 | 6.4 | 9.5  | 8.3 | 10.0 | 1.4 | 0.0 | 4.3 |
| Portugal                                   | 52.1 | 7.9 | 3.8 | 0.9 | 7.9 | 5.3  | 7.5 | 9.4  | 1.9 | 4.3 | 3.2 |
| Jamaica                                    | 52.1 | 3.3 | 5.5 | 0.8 | 7.8 | 4.0  | 9.2 | 10.0 | 2.5 | 3.8 | 5.1 |
| Panama                                     | 51.9 | 1.5 | 3.5 | 1.7 | 7.1 | 6.2  | 8.1 | 8.3  | 2.1 | 9.7 | 3.8 |
| Morocco                                    | 51.8 | 5.0 | 2.5 | 0.1 | 9.3 | 9.4  | 9.4 | 9.2  | 0.8 | 2.9 | 3.0 |
| Cape Verde                                 | 51.6 | 1.4 | 1.7 | 1.8 | 9.3 | 10.0 | 9.1 | 10.0 | 0.5 | 2.3 | 5.5 |
| Sierra Leone                               | 51.4 | 2.8 | 1.7 | 1.7 | 9.4 | 10.0 | 9.8 | 10.0 | 0.3 | 0.0 | 5.8 |
| Nigeria                                    | 51.2 | 2.8 | 2.8 | 1.1 | 9.0 | 9.8  | 9.5 | 10.0 | 0.4 | 0.0 | 5.8 |
| Kenya                                      | 50.5 | 2.2 | 2.3 | 1.9 | 9.2 | 10.0 | 9.1 | 10.0 | 0.9 | 0.0 | 4.9 |
| Gambia                                     | 50.5 | 1.6 | 0.2 | 1.6 | 9.3 | 10.0 | 9.5 | 10.0 | 0.3 | 2.2 | 5.8 |
| Andorra                                    | 50.2 | 7.6 | 5.9 | 0.9 | 4.4 | 5.0  | 5.4 | 9.9  | 4.6 | 4.4 | 2.2 |
| Iraq                                       | 49.9 | 9.7 | 3.0 | 0.3 | 8.5 | 5.2  | 9.5 | 9.3  | 1.0 | 0.9 | 2.5 |
| Mali                                       | 49.8 | 3.5 | 1.0 | 0.7 | 9.6 | 9.5  | 9.1 | 10.0 | 0.6 | 0.0 | 5.9 |
| Guyana                                     | 49.8 | 1.3 | 2.7 | 1.6 | 8.8 | 8.7  | 9.6 | 10.0 | 1.1 | 0.0 | 5.9 |
| Benin                                      | 49.7 | 2.5 | 1.4 | 1.2 | 9.5 | 10.0 | 9.6 | 10.0 | 0.5 | 0.0 | 5.0 |
| Angola                                     | 49.7 | 1.4 | 1.7 | 0.9 | 8.8 | 8.2  | 9.2 | 10.0 | 0.6 | 4.1 | 4.9 |
| Tanzania, United Republic of               | 49.3 | 2.4 | 2.0 | 2.9 | 9.4 | 10.0 | 9.4 | 10.0 | 0.5 | 0.0 | 2.7 |
| Venezuela, Bolivarian Republic of          | 49.3 | 1.5 | 4.8 | 1.9 | 6.2 | 6.3  | 8.5 | 6.9  | 2.5 | 7.2 | 3.6 |
| Malawi                                     | 49.3 | 1.6 | 2.2 | 2.6 | 9.6 | 10.0 | 9.7 | 10.0 | 0.2 | 0.0 | 3.3 |
| Mauritania                                 | 49.3 | 0.7 | 0.5 | 0.5 | 9.1 | 10.0 | 8.8 | 10.0 | 0.6 | 3.6 | 5.4 |
| Togo                                       | 49.2 | 2.2 | 0.5 | 1.2 | 9.4 | 10.0 | 9.6 | 10.0 | 0.3 | 0.0 | 5.9 |
| Sao Tome and Principe                      | 49.0 | 2.2 | 1.5 | 1.1 | 9.3 | 9.4  | 9.4 | 10.0 | 0.6 | 0.0 | 5.5 |
| Seychelles                                 | 48.8 | 4.2 | 3.5 | 2.1 | 8.4 | 7.1  | 8.9 | 10.0 | 1.2 | 2.4 | 1.1 |
| Belgium                                    | 48.6 | 5.5 | 3.1 | 1.1 | 6.6 | 3.4  | 6.6 | 9.3  | 2.9 | 6.8 | 3.2 |
| Bolivia, Plurinational State of            | 48.5 | 3.1 | 4.1 | 0.8 | 8.5 | 5.2  | 8.1 | 8.9  | 1.4 | 5.6 | 3.0 |
| Honduras                                   | 48.4 | 1.7 | 3.8 | 1.8 | 8.5 | 9.8  | 9.3 | 8.3  | 0.9 | 0.0 | 4.3 |
| Nepal                                      | 48.3 | 2.9 | 1.3 | 2.1 | 9.9 | 7.9  | 9.4 | 9.0  | 0.7 | 1.1 | 4.1 |
| Burkina Faso                               | 48.2 | 1.5 | 0.3 | 0.9 | 9.6 | 10.0 | 9.4 | 10.0 | 0.5 | 0.0 | 5.9 |
| Niger                                      | 48.2 | 1.9 | 0.4 | 1.0 | 9.6 | 10.0 | 9.0 | 10.0 | 0.5 | 0.0 | 5.9 |
| Botswana                                   | 48.1 | 1.5 | 1.3 | 1.6 | 8.0 | 10.0 | 8.9 | 10.0 | 0.9 | 2.4 | 3.3 |
| Serbia                                     | 48.0 | 6.0 | 4.0 | 0.7 | 7.4 | 7.0  | 7.9 | 10.0 | 2.1 | 2.8 | 0.1 |
| Congo                                      | 48.0 | 1.6 | 2.5 | 1.6 | 8.7 | 7.8  | 9.5 | 10.0 | 0.6 | 0.8 | 4.9 |
| Singapore                                  | 47.8 | 5.8 | 3.1 | 2.0 | 8.4 | 6.7  | 8.2 | 10.0 | 2.1 | 1.6 | 0.1 |
| South Sudan                                | 47.7 | 2.3 | 2.2 | 1.7 | 8.9 | 10.0 | 9.2 | 10.0 | 0.8 | 0.0 | 2.7 |
| Liberia                                    | 47.7 | 2.4 | 2.7 | 1.8 | 9.6 | 4.9  | 9.7 | 10.0 | 0.6 | 0.1 | 5.9 |
| Nicaragua                                  | 47.7 | 0.6 | 1.9 | 1.5 | 8.4 | 10.0 | 9.4 | 8.2  | 0.9 | 2.6 | 4.3 |
| Ecuador                                    | 47.7 | 1.7 | 8.9 | 1.0 | 5.9 | 4.6  | 8.6 | 8.3  | 1.4 | 4.8 | 2.5 |
| Norway                                     | 47.6 | 3.1 | 4.4 | 0.6 | 7.0 | 1.7  | 6.4 | 10.0 | 2.5 | 9.9 | 2.0 |
| New Zealand                                | 47.6 | 6.4 | 4.8 | 1.6 | 7.9 | 5.3  | 5.0 | 8.7  | 3.1 | 2.8 | 1.9 |
| Congo, the Democratic Republic of the      | 47.5 | 1.2 | 1.8 | 2.0 | 9.4 | 6.0  | 9.4 | 10.0 | 0.4 | 0.0 | 7.4 |
| Macedonia, the former Yugoslav Republic of | 47.4 | 9.1 | 3.5 | 0.3 | 7.4 | 6.3  | 8.4 | 10.0 | 1.7 | 0.4 | 0.2 |
| Costa Rica                                 | 47.3 | 1.7 | 5.0 | 1.0 | 7.0 | 10.0 | 8.3 | 6.2  | 2.0 | 2.2 | 3.8 |
| Montenegro                                 | 47.2 | 9.1 | 5.8 | 0.5 | 7.1 | 4.8  | 7.1 | 9.7  | 2.0 | 1.0 | 0.1 |

## Supplementary data

|                          |      |     |     |     |     |      |     |      |     |     |     |
|--------------------------|------|-----|-----|-----|-----|------|-----|------|-----|-----|-----|
| Samoa                    | 47.1 | 1.8 | 2.3 | 0.8 | 9.5 | 4.8  | 8.8 | 10.0 | 0.9 | 0.4 | 7.9 |
| El Salvador              | 47.0 | 1.8 | 2.4 | 1.7 | 8.5 | 9.7  | 9.5 | 8.2  | 0.9 | 0.0 | 4.2 |
| Oman                     | 46.9 | 7.4 | 5.1 | 0.5 | 6.3 | 5.6  | 8.7 | 9.3  | 1.8 | 0.0 | 2.1 |
| Zimbabwe                 | 46.9 | 0.8 | 0.6 | 2.1 | 8.8 | 8.5  | 9.4 | 10.0 | 0.5 | 3.4 | 2.9 |
| Solomon Islands          | 46.8 | 1.1 | 1.9 | 0.9 | 9.7 | 7.3  | 9.3 | 10.0 | 0.4 | 0.0 | 6.1 |
| Comoros                  | 46.6 | 1.7 | 1.7 | 1.5 | 9.4 | 9.6  | 9.4 | 10.0 | 0.5 | 0.0 | 2.8 |
| Netherlands              | 46.6 | 4.0 | 5.3 | 1.2 | 6.3 | 3.6  | 5.9 | 7.7  | 2.5 | 6.8 | 3.3 |
| Lesotho                  | 46.6 | 1.4 | 1.0 | 2.5 | 9.5 | 6.8  | 9.2 | 10.0 | 0.6 | 1.6 | 4.1 |
| India                    | 46.5 | 3.0 | 1.3 | 1.3 | 9.9 | 10.0 | 9.7 | 8.9  | 0.4 | 0.0 | 2.0 |
| Chad                     | 46.5 | 0.8 | 0.7 | 0.1 | 9.5 | 10.0 | 9.1 | 10.0 | 0.5 | 0.0 | 5.8 |
| United Kingdom           | 46.5 | 5.0 | 4.1 | 0.8 | 7.1 | 3.7  | 6.6 | 9.3  | 2.7 | 3.0 | 4.2 |
| Egypt                    | 46.3 | 9.1 | 3.1 | 1.0 | 9.0 | 8.3  | 9.3 | 2.1  | 1.3 | 0.1 | 2.8 |
| Swaziland                | 46.1 | 1.5 | 3.0 | 1.9 | 8.3 | 7.5  | 8.4 | 10.0 | 1.0 | 1.1 | 3.4 |
| Saudi Arabia             | 46.0 | 8.0 | 4.3 | 0.7 | 3.8 | 4.0  | 9.2 | 10.0 | 2.6 | 1.6 | 1.9 |
| Bhutan                   | 45.9 | 2.1 | 1.3 | 1.8 | 9.9 | 8.0  | 9.6 | 9.1  | 0.6 | 0.0 | 3.6 |
| United States            | 45.9 | 6.0 | 5.0 | 1.3 | 1.0 | 6.5  | 4.6 | 5.8  | 4.0 | 9.4 | 2.2 |
| Timor-Leste              | 45.8 | 1.7 | 1.0 | 2.1 | 9.7 | 9.1  | 9.3 | 10.0 | 2.5 | 0.0 | 0.4 |
| Global                   | 45.5 | 4.0 | 2.4 | 1.2 | 7.9 | 8.1  | 8.2 | 9.5  | 2.5 | 1.6 | 0.2 |
| Greenland                | 45.5 | 6.6 | 5.2 | 1.3 | 2.2 | 6.3  | 4.4 | 7.6  | 5.2 | 5.0 | 1.8 |
| Algeria                  | 45.5 | 4.3 | 1.8 | 0.2 | 8.2 | 6.0  | 9.4 | 9.7  | 0.9 | 2.5 | 2.5 |
| Central African Republic | 45.5 | 1.3 | 2.3 | 1.2 | 9.6 | 5.7  | 8.8 | 10.0 | 0.9 | 0.0 | 5.6 |
| Sudan                    | 45.4 | 3.8 | 1.7 | 0.2 | 9.6 | 7.2  | 9.5 | 9.2  | 0.5 | 0.4 | 3.3 |
| Eritrea                  | 45.3 | 1.2 | 1.1 | 1.5 | 9.7 | 8.5  | 9.6 | 10.0 | 0.3 | 0.0 | 3.5 |
| Bosnia and Herzegovina   | 45.2 | 7.1 | 1.2 | 1.1 | 9.3 | 6.2  | 9.2 | 10.0 | 0.8 | 0.0 | 0.4 |
| France                   | 45.2 | 6.2 | 3.6 | 0.4 | 7.1 | 3.3  | 5.7 | 9.9  | 3.4 | 2.3 | 3.2 |
| Ghana                    | 45.1 | 1.6 | 4.0 | 0.8 | 9.3 | 4.3  | 9.7 | 10.0 | 0.5 | 0.0 | 4.9 |
| Bulgaria                 | 45.1 | 7.1 | 3.2 | 0.3 | 6.9 | 5.7  | 6.9 | 10.0 | 2.5 | 2.4 | 0.1 |
| Burundi                  | 45.0 | 1.3 | 1.3 | 1.0 | 9.6 | 8.8  | 9.5 | 10.0 | 0.2 | 0.0 | 3.3 |
| Somalia                  | 45.0 | 1.1 | 1.1 | 1.1 | 9.7 | 8.1  | 9.6 | 10.0 | 0.4 | 0.5 | 3.3 |
| Mozambique               | 45.0 | 0.7 | 1.0 | 0.9 | 9.8 | 8.5  | 9.7 | 10.0 | 0.2 | 0.7 | 3.5 |
| Maldives                 | 44.8 | 4.0 | 2.5 | 0.6 | 9.2 | 8.1  | 9.8 | 10.0 | 0.6 | 0.0 | 0.1 |
| Guinea-Bissau            | 44.7 | 1.1 | 2.3 | 2.2 | 9.5 | 3.8  | 9.1 | 10.0 | 0.3 | 0.8 | 5.7 |
| Vanuatu                  | 44.6 | 1.6 | 1.9 | 0.7 | 9.6 | 4.8  | 8.9 | 10.0 | 0.7 | 0.3 | 6.0 |
| South Africa             | 44.6 | 2.7 | 1.6 | 2.6 | 7.2 | 4.3  | 8.4 | 10.0 | 1.8 | 2.1 | 3.7 |
| Palestine                | 44.5 | 4.3 | 2.2 | 0.2 | 9.4 | 5.9  | 9.4 | 9.2  | 0.7 | 0.0 | 3.3 |
| Thailand                 | 44.5 | 2.3 | 4.1 | 2.2 | 8.5 | 6.3  | 9.2 | 10.0 | 1.8 | 0.0 | 0.2 |
| Pakistan                 | 44.5 | 1.7 | 1.6 | 0.1 | 9.9 | 8.2  | 9.3 | 9.1  | 0.9 | 0.0 | 3.6 |
| Colombia                 | 44.4 | 2.1 | 4.2 | 1.5 | 7.3 | 6.9  | 8.5 | 8.6  | 1.7 | 2.0 | 1.6 |
| Syrian Arab Republic     | 44.4 | 4.2 | 2.2 | 0.3 | 9.3 | 5.9  | 9.3 | 9.3  | 0.8 | 0.1 | 3.0 |
| Ethiopia                 | 44.3 | 0.7 | 0.2 | 0.6 | 9.7 | 10.0 | 9.5 | 10.0 | 0.3 | 0.0 | 3.4 |
| Equatorial Guinea        | 44.3 | 1.0 | 1.4 | 1.2 | 9.6 | 5.6  | 9.5 | 10.0 | 0.3 | 0.0 | 5.7 |
| Peru                     | 44.3 | 1.8 | 2.7 | 1.3 | 7.8 | 6.9  | 9.5 | 8.8  | 1.0 | 1.9 | 2.7 |
| Côte d'Ivoire            | 44.2 | 2.7 | 4.1 | 1.0 | 8.9 | 4.4  | 9.5 | 10.0 | 0.5 | 0.0 | 3.1 |
| Madagascar               | 44.2 | 1.6 | 2.7 | 2.2 | 9.5 | 5.4  | 8.8 | 10.0 | 0.9 | 0.0 | 3.1 |
| Kiribati                 | 44.2 | 1.4 | 1.8 | 0.7 | 9.6 | 4.7  | 9.0 | 10.0 | 0.6 | 0.2 | 6.0 |
| Ireland                  | 44.1 | 3.9 | 3.1 | 1.7 | 7.6 | 3.3  | 6.2 | 10.0 | 3.3 | 2.3 | 2.9 |
| Australia                | 44.0 | 4.4 | 3.9 | 1.6 | 6.5 | 5.7  | 5.1 | 8.4  | 3.7 | 1.0 | 3.7 |

## Supplementary data

|                                  |      |     |     |     |     |      |     |      |     |     |     |
|----------------------------------|------|-----|-----|-----|-----|------|-----|------|-----|-----|-----|
| Marshall Islands                 | 43.9 | 1.8 | 2.4 | 0.8 | 9.6 | 3.6  | 8.8 | 10.0 | 0.9 | 0.0 | 6.0 |
| Indonesia                        | 43.9 | 1.4 | 1.3 | 2.6 | 9.8 | 8.5  | 9.7 | 10.0 | 0.4 | 0.0 | 0.2 |
| Myanmar                          | 43.8 | 2.7 | 1.0 | 2.0 | 9.8 | 8.0  | 9.7 | 10.0 | 0.3 | 0.0 | 0.4 |
| Namibia                          | 43.8 | 1.2 | 1.2 | 0.7 | 8.0 | 10.0 | 8.7 | 10.0 | 0.8 | 0.0 | 3.3 |
| Tonga                            | 43.7 | 1.9 | 2.7 | 0.9 | 9.5 | 3.7  | 8.7 | 10.0 | 1.0 | 0.1 | 5.2 |
| Micronesia, Federated States of  | 43.5 | 1.8 | 2.4 | 0.8 | 9.6 | 3.6  | 8.8 | 10.0 | 0.8 | 0.0 | 5.6 |
| Yemen                            | 43.1 | 2.6 | 1.4 | 0.0 | 9.5 | 7.0  | 9.5 | 9.2  | 0.7 | 0.0 | 3.2 |
| Moldova, Republic of             | 43.1 | 5.7 | 3.3 | 0.9 | 9.3 | 1.1  | 8.3 | 9.8  | 1.3 | 0.9 | 2.5 |
| Denmark                          | 43.0 | 3.9 | 3.3 | 1.8 | 6.9 | 1.5  | 5.2 | 9.6  | 3.0 | 4.4 | 3.4 |
| Germany                          | 42.7 | 3.9 | 4.5 | 1.9 | 6.5 | 2.6  | 5.2 | 8.8  | 2.3 | 4.2 | 2.9 |
| Papua New Guinea                 | 42.7 | 1.4 | 1.9 | 0.7 | 9.6 | 3.3  | 9.0 | 10.0 | 0.5 | 0.0 | 6.2 |
| Austria                          | 42.7 | 3.7 | 5.7 | 1.7 | 7.3 | 2.8  | 4.9 | 10.0 | 2.6 | 1.3 | 2.7 |
| Luxembourg                       | 42.5 | 4.0 | 7.6 | 1.2 | 5.2 | 1.3  | 5.7 | 9.8  | 2.8 | 2.5 | 2.5 |
| Malaysia                         | 42.4 | 1.5 | 2.4 | 1.4 | 9.1 | 4.9  | 9.0 | 10.0 | 2.4 | 1.5 | 0.1 |
| Canada                           | 42.4 | 5.9 | 5.0 | 1.3 | 3.6 | 8.0  | 5.3 | 5.3  | 4.7 | 1.4 | 1.9 |
| Bangladesh                       | 42.3 | 0.7 | 0.5 | 2.7 | 9.9 | 5.3  | 9.8 | 9.0  | 0.2 | 0.2 | 3.9 |
| Romania                          | 41.7 | 7.9 | 2.5 | 0.8 | 6.9 | 3.0  | 7.3 | 9.7  | 1.7 | 1.7 | 0.1 |
| Chile                            | 41.6 | 5.5 | 2.1 | 0.2 | 6.3 | 4.1  | 7.9 | 10.0 | 1.7 | 2.4 | 1.6 |
| Croatia                          | 41.6 | 4.4 | 3.5 | 0.9 | 6.5 | 4.0  | 8.4 | 9.7  | 1.3 | 2.8 | 0.1 |
| Russian Federation               | 41.4 | 4.7 | 1.8 | 0.4 | 8.3 | 2.6  | 6.7 | 10.0 | 3.1 | 1.3 | 2.5 |
| Albania                          | 41.4 | 6.2 | 1.9 | 0.1 | 8.4 | 4.7  | 8.7 | 9.7  | 0.8 | 0.4 | 0.4 |
| Ukraine                          | 41.3 | 4.9 | 1.8 | 0.1 | 9.1 | 3.5  | 7.6 | 10.0 | 1.9 | 0.3 | 2.1 |
| Sri Lanka                        | 41.1 | 1.7 | 1.9 | 1.5 | 9.4 | 5.7  | 9.9 | 10.0 | 0.8 | 0.0 | 0.2 |
| Philippines                      | 41.1 | 3.9 | 4.8 | 1.9 | 7.9 | 2.5  | 9.0 | 10.0 | 0.8 | 0.0 | 0.2 |
| Djibouti                         | 41.0 | 3.0 | 0.5 | 0.6 | 8.7 | 3.4  | 9.1 | 10.0 | 0.5 | 2.4 | 2.8 |
| Zambia                           | 40.9 | 1.9 | 0.5 | 2.9 | 9.2 | 3.3  | 9.5 | 10.0 | 0.6 | 0.1 | 2.8 |
| Sweden                           | 40.8 | 3.2 | 3.9 | 0.8 | 7.0 | 2.4  | 6.4 | 10.0 | 2.6 | 2.8 | 1.6 |
| China                            | 40.7 | 2.9 | 0.9 | 1.2 | 9.7 | 6.3  | 8.5 | 10.0 | 0.5 | 0.6 | 0.0 |
| Mexico                           | 40.6 | 2.9 | 4.3 | 2.6 | 2.6 | 10.0 | 7.9 | 1.4  | 1.7 | 3.4 | 3.7 |
| Viet Nam                         | 40.5 | 2.6 | 2.0 | 2.5 | 9.8 | 3.6  | 9.2 | 10.0 | 0.5 | 0.0 | 0.3 |
| Lithuania                        | 40.4 | 4.3 | 2.7 | 0.2 | 8.8 | 3.2  | 6.6 | 9.4  | 3.0 | 0.1 | 2.1 |
| Switzerland                      | 40.3 | 4.8 | 5.4 | 0.7 | 6.6 | 3.1  | 5.9 | 8.2  | 2.1 | 1.0 | 2.5 |
| Brunei Darussalam                | 40.2 | 3.8 | 3.3 | 1.7 | 4.3 | 6.3  | 7.6 | 10.0 | 3.2 | 0.0 | 0.1 |
| Armenia                          | 39.9 | 7.4 | 2.6 | 0.1 | 8.8 | 0.5  | 8.8 | 10.0 | 1.1 | 0.0 | 0.8 |
| Poland                           | 39.8 | 6.4 | 1.7 | 0.2 | 7.8 | 2.4  | 6.4 | 9.9  | 2.6 | 0.5 | 2.0 |
| Lao People's Democratic Republic | 39.4 | 1.4 | 1.4 | 2.8 | 9.7 | 3.7  | 9.4 | 10.0 | 0.7 | 0.0 | 0.3 |
| Cambodia                         | 39.0 | 2.7 | 1.1 | 2.8 | 9.8 | 2.5  | 9.3 | 10.0 | 0.5 | 0.0 | 0.4 |
| Finland                          | 38.8 | 3.0 | 3.4 | 1.1 | 7.3 | 1.9  | 6.7 | 9.6  | 2.7 | 0.0 | 3.1 |
| Uzbekistan                       | 38.6 | 7.5 | 1.1 | 0.0 | 9.0 | 0.3  | 8.4 | 10.0 | 1.2 | 0.0 | 1.0 |
| Argentina                        | 38.5 | 4.1 | 3.7 | 0.1 | 4.0 | 1.4  | 5.7 | 10.0 | 3.9 | 3.1 | 2.6 |
| Afghanistan                      | 38.4 | 2.1 | 1.6 | 0.2 | 9.7 | 2.7  | 8.9 | 9.2  | 0.4 | 0.0 | 3.5 |
| Iceland                          | 38.2 | 2.0 | 3.5 | 0.2 | 6.4 | 0.3  | 6.4 | 9.8  | 2.7 | 3.3 | 3.5 |
| Hungary                          | 38.0 | 4.9 | 3.0 | 1.0 | 7.0 | 3.5  | 5.4 | 8.6  | 3.2 | 1.5 | 0.0 |
| Estonia                          | 37.7 | 3.3 | 2.6 | 0.4 | 8.8 | 1.7  | 6.9 | 9.0  | 2.3 | 0.7 | 2.0 |
| Georgia                          | 37.7 | 4.9 | 3.2 | 0.1 | 8.3 | 1.3  | 8.4 | 9.8  | 1.3 | 0.0 | 0.5 |
| Tajikistan                       | 37.5 | 6.0 | 1.4 | 0.0 | 8.8 | 0.7  | 9.1 | 10.0 | 0.6 | 0.0 | 0.9 |
| Belarus                          | 37.4 | 4.4 | 1.9 | 0.0 | 9.0 | 0.5  | 6.3 | 10.0 | 3.0 | 0.0 | 2.2 |

## Supplementary data

|                |      |     |     |     |     |     |     |      |     |     |     |
|----------------|------|-----|-----|-----|-----|-----|-----|------|-----|-----|-----|
| Slovenia       | 36.9 | 3.4 | 4.0 | 1.3 | 5.8 | 3.3 | 6.3 | 8.4  | 3.0 | 1.4 | 0.1 |
| Slovakia       | 36.7 | 4.2 | 2.6 | 1.0 | 7.5 | 5.0 | 6.5 | 7.0  | 2.1 | 0.8 | 0.1 |
| Turkmenistan   | 35.7 | 5.5 | 1.5 | 0.0 | 8.2 | 0.7 | 7.9 | 10.0 | 1.1 | 0.0 | 0.7 |
| Kyrgyzstan     | 35.5 | 4.3 | 1.0 | 0.1 | 8.9 | 1.2 | 7.5 | 10.0 | 1.3 | 0.5 | 0.9 |
| Azerbaijan     | 35.3 | 4.1 | 3.5 | 0.0 | 8.3 | 0.6 | 9.1 | 8.1  | 0.9 | 0.0 | 0.7 |
| Czech Republic | 35.3 | 3.6 | 3.0 | 2.0 | 5.9 | 2.7 | 6.0 | 9.0  | 2.4 | 0.5 | 0.1 |
| Latvia         | 35.3 | 4.7 | 2.3 | 0.1 | 8.6 | 0.5 | 6.7 | 6.2  | 3.4 | 0.8 | 1.9 |
| Uruguay        | 34.6 | 2.2 | 2.8 | 0.4 | 5.9 | 2.4 | 5.4 | 10.0 | 3.1 | 1.1 | 1.4 |
| Kazakhstan     | 34.3 | 3.6 | 0.6 | 0.0 | 7.5 | 0.6 | 7.2 | 10.0 | 2.4 | 1.7 | 0.5 |
| Mongolia       | 28.4 | 1.0 | 0.3 | 0.0 | 8.9 | 1.0 | 4.8 | 10.0 | 1.4 | 0.0 | 1.0 |

---

## Supplementary data

**Supplemental Table 5.** Percentage reductions in total deaths as a result of improvements in the Alternate Healthy Eating Index from the current diet to the reference healthy die in men and women aged 25 years or older in 190 countries/ territories in 2017. <sup>1</sup>

| Countries/ Territories                | PAF <sup>2</sup> | PAF <sup>3</sup> |
|---------------------------------------|------------------|------------------|
| Afghanistan                           | 28.5 (15.0-39.4) | 29.2 (24.4-33.8) |
| Albania                               | 23.9 (9.4-36.4)  | 28.3 (23.1-33.4) |
| Algeria                               | 23.6 (11.3-33.9) | 24.3 (19.8-28.6) |
| Andorra                               | 22.8 (8.6-34.2)  | 26.9 (21.8-31.5) |
| Angola                                | 15.5 (8.5-22.4)  | 14.6 (12.3-17.2) |
| Antigua and Barbuda                   | 20.5 (9.4-30.5)  | 21.5 (17.5-25.5) |
| Argentina                             | 27.3 (11.6-39.1) | 29.3 (23.9-34.0) |
| Armenia                               | 29.0 (16.3-40.2) | 29.9 (25.1-34.7) |
| Australia                             | 26.1 (9.6-38.4)  | 30.1 (24.4-35.1) |
| Austria                               | 28.9 (13.0-40.1) | 31.6 (25.9-36.2) |
| Azerbaijan                            | 32.6 (15.2-45.4) | 33.2 (26.7-38.8) |
| Bahrain                               | 23.8 (13.1-32.8) | 22.2 (18.2-26.1) |
| Bangladesh                            | 28.6 (14.6-41.6) | 29.4 (24.7-34.5) |
| Barbados                              | 20.6 (10.3-29.8) | 22.6 (18.7-26.3) |
| Belarus                               | 28.7 (15.6-39.7) | 30.3 (25.2-35.1) |
| Belgium                               | 23.4 (9.3-35.2)  | 26.9 (21.9-31.6) |
| Belize                                | 20.8 (9.0-30.4)  | 20.5 (16.5-24.2) |
| Benin                                 | 17.1 (8.3-25.0)  | 17.5 (14.5-20.5) |
| Bermuda                               | 15.9 (7.3-25.0)  | 18.0 (14.7-21.8) |
| Bhutan                                | 26.0 (11.5-38.5) | 24.7 (20.1-29.5) |
| Bolivia, Plurinational State of       | 25.0 (10.3-37.0) | 25.6 (20.9-30.3) |
| Bosnia and Herzegovina                | 24.6 (11.1-35.8) | 28.1 (23.0-32.7) |
| Botswana                              | 16.5 (7.7-23.4)  | 17.2 (14.1-19.9) |
| Brazil                                | 19.0 (8.0-27.3)  | 19.9 (16.1-23.1) |
| Brunei Darussalam                     | 27.9 (13.4-39.5) | 29.9 (24.6-34.9) |
| Bulgaria                              | 26.9 (11.6-38.5) | 30.0 (24.3-34.8) |
| Burkina Faso                          | 18.7 (9.2-26.9)  | 18.6 (15.4-22.0) |
| Burundi                               | 17.4 (9.1-24.1)  | 16.4 (13.7-19.0) |
| Cambodia                              | 22.7 (8.1-34.6)  | 23.2 (18.7-27.6) |
| Cameroon                              | 14.0 (5.7-20.7)  | 13.9 (11.2-16.4) |
| Canada                                | 24.7 (9.7-37.1)  | 28.2 (22.8-33.3) |
| Cape Verde                            | 17.7 (7.4-26.0)  | 18.9 (15.3-22.3) |
| Central African Republic              | 15.2 (7.4-21.4)  | 14.6 (11.9-17.1) |
| Chad                                  | 18.5 (7.7-26.2)  | 18.5 (15.0-21.5) |
| Chile                                 | 27.2 (10.8-39.9) | 30.2 (24.9-35.2) |
| China                                 | 24.6 (8.6-37.1)  | 29.7 (24.2-34.7) |
| Colombia                              | 23.4 (8.6-35.0)  | 25.1 (20.2-29.5) |
| Comoros                               | 21.2 (10.0-30.2) | 21.4 (17.6-25.0) |
| Congo                                 | 18.4 (8.0-25.6)  | 18.0 (14.5-20.9) |
| Costa Rica                            | 23.3 (10.7-34.9) | 24.3 (20.1-28.8) |
| Côte d'Ivoire                         | 17.4 (7.6-24.6)  | 17.1 (13.9-20.0) |
| Croatia                               | 27.8 (12.3-41.3) | 31.8 (26.1-37.5) |
| Cuba                                  | 17.1 (7.8-25.6)  | 18.8 (15.3-22.3) |
| Cyprus                                | 27.6 (13.7-40.3) | 29.6 (24.6-35.0) |
| Czech Republic                        | 29.8 (12.9-42.9) | 33.5 (27.2-39.1) |
| Congo, the Democratic Republic of the | 19.6 (9.8-28.1)  | 18.6 (15.3-22.1) |
| Denmark                               | 25.4 (9.1-37.1)  | 29.1 (23.5-33.9) |
| Djibouti                              | 18.9 (9.5-27.2)  | 18.8 (15.5-22.2) |
| Dominica                              | 22.4 (9.6-32.9)  | 23.8 (19.3-28.1) |
| Dominican Republic                    | 16.0 (7.3-23.5)  | 16.4 (13.3-19.3) |
| Ecuador                               | 25.6 (10.2-37.4) | 25.8 (21.1-30.2) |
| Egypt                                 | 26.2 (14.1-37.4) | 24.3 (20.0-28.8) |
| El Salvador                           | 23.7 (10.9-35.4) | 22.6 (18.8-26.9) |
| Equatorial Guinea                     | 13.8 (6.5-19.5)  | 13.1 (10.7-15.3) |
| Eritrea                               | 17.3 (7.9-24.3)  | 17.1 (13.9-19.8) |
| Estonia                               | 28.6 (15.8-41.3) | 31.3 (26.4-36.8) |
| Ethiopia                              | 19.5 (9.1-27.7)  | 19.0 (15.6-22.1) |
| Micronesia, Federated States of       | 29.0 (14.0-41.7) | 29.0 (23.9-34.2) |
| Fiji                                  | 27.9 (15.5-37.9) | 25.6 (20.7-30.0) |
| Finland                               | 27.9 (9.8-41.2)  | 33.3 (27.0-38.6) |

## Supplementary data

|                                            |                  |                  |
|--------------------------------------------|------------------|------------------|
| France                                     | 23.6 (8.9-35.1)  | 29.0 (23.8-33.5) |
| Gabon                                      | 19.4 (9.1-27.7)  | 19.0 (15.5-22.3) |
| Georgia                                    | 30.9 (14.6-44.5) | 34.2 (28.3-39.8) |
| Germany                                    | 28.7 (13.0-41.3) | 31.7 (26.2-36.9) |
| Ghana                                      | 16.5 (7.5-23.5)  | 17.0 (13.9-19.7) |
| Greece                                     | 23.0 (8.5-34.4)  | 27.1 (22.0-31.6) |
| Greenland                                  | 22.4 (10.1-33.0) | 25.5 (20.9-29.9) |
| Grenada                                    | 22.5 (9.9-33.0)  | 23.5 (18.9-27.7) |
| Guatemala                                  | 20.4 (9.1-29.4)  | 19.0 (15.5-22.2) |
| Guinea                                     | 16.9 (7.9-24.9)  | 17.9 (14.8-21.0) |
| Guinea-Bissau                              | 18.5 (8.6-26.6)  | 18.4 (15.1-21.6) |
| Guyana                                     | 23.0 (12.1-33.0) | 22.8 (18.9-26.9) |
| Haiti                                      | 20.2 (9.7-29.4)  | 20.2 (16.5-23.8) |
| Honduras                                   | 26.4 (13.3-38.0) | 25.0 (20.6-29.6) |
| Hungary                                    | 27.7 (12.9-39.4) | 30.8 (25.2-35.7) |
| Iceland                                    | 26.0 (12.0-37.9) | 30.2 (25.0-35.1) |
| India                                      | 23.0 (8.6-32.7)  | 21.4 (16.8-25.1) |
| Indonesia                                  | 25.8 (11.6-37.1) | 27.1 (22.5-31.5) |
| Iran, Islamic Republic of                  | 19.2 (9.0-28.4)  | 19.9 (16.1-23.7) |
| Iraq                                       | 19.5 (8.2-28.5)  | 20.5 (16.5-24.2) |
| Ireland                                    | 26.1 (12.0-38.9) | 30.1 (25.0-35.3) |
| Israel                                     | 17.3 (7.4-27.1)  | 19.2 (15.7-23.0) |
| Italy                                      | 23.0 (5.4-35.3)  | 27.6 (21.6-32.5) |
| Jamaica                                    | 22.4 (8.2-33.6)  | 24.4 (19.4-28.9) |
| Japan                                      | 16.2 (5.8-25.3)  | 20.8 (17.1-24.2) |
| Jordan                                     | 22.4 (9.8-32.1)  | 22.8 (18.4-26.7) |
| Kazakhstan                                 | 28.8 (16.1-40.1) | 29.8 (25.2-34.5) |
| Kenya                                      | 15.7 (7.5-22.4)  | 14.5 (11.9-17.0) |
| Kiribati                                   | 28.7 (15.6-39.2) | 28.0 (23.4-32.3) |
| Kuwait                                     | 21.0 (11.2-30.2) | 21.3 (17.4-25.2) |
| Kyrgyzstan                                 | 30.0 (15.6-42.5) | 30.1 (24.9-35.3) |
| Lao People's Democratic Republic           | 23.1 (9.3-33.7)  | 23.6 (19.1-27.6) |
| Latvia                                     | 28.3 (14.1-40.1) | 32.1 (26.7-37.1) |
| Lebanon                                    | 19.7 (10.0-28.3) | 21.0 (17.2-24.8) |
| Lesotho                                    | 14.9 (7.2-20.9)  | 15.1 (12.5-17.4) |
| Liberia                                    | 19.3 (8.7-26.1)  | 19.1 (15.6-21.8) |
| Libyan Arab Jamahiriya                     | 20.8 (10.4-29.6) | 21.1 (17.2-24.7) |
| Lithuania                                  | 27.3 (13.2-38.7) | 29.2 (23.7-34.1) |
| Luxembourg                                 | 26.3 (12.0-38.3) | 30.5 (25.4-35.3) |
| Macedonia, the former Yugoslav Republic of | 21.8 (9.2-33.5)  | 26.4 (21.7-31.2) |
| Madagascar                                 | 22.6 (9.7-32.7)  | 23.0 (18.7-27.0) |
| Malawi                                     | 15.8 (7.7-23.0)  | 15.2 (12.6-18.0) |
| Malaysia                                   | 22.6 (10.4-31.6) | 23.7 (19.4-27.3) |
| Maldives                                   | 28.0 (12.6-41.1) | 28.1 (23.1-33.2) |
| Mali                                       | 19.0 (9.1-27.2)  | 19.2 (15.8-22.4) |
| Malta                                      | 24.0 (11.1-34.7) | 26.8 (22.0-31.2) |
| Marshall Islands                           | 29.1 (11.1-40.8) | 29.0 (23.0-33.7) |
| Mauritania                                 | 21.6 (9.4-31.5)  | 22.1 (17.9-26.0) |
| Mauritius                                  | 24.4 (10.6-35.6) | 22.7 (18.4-26.9) |
| Mexico                                     | 29.6 (13.8-42.6) | 27.0 (22.3-31.8) |
| Moldova, Republic of                       | 29.3 (13.3-40.9) | 29.9 (24.0-34.7) |
| Mongolia                                   | 28.6 (11.7-42.0) | 34.4 (28.5-39.9) |
| Montenegro                                 | 23.2 (9.2-35.0)  | 28.2 (23.0-33.0) |
| Morocco                                    | 22.3 (11.6-31.3) | 22.3 (18.2-26.1) |
| Mozambique                                 | 12.2 (4.8-17.8)  | 13.1 (10.6-15.3) |
| Myanmar                                    | 24.8 (11.6-34.9) | 23.8 (19.7-27.5) |
| Namibia                                    | 17.4 (8.2-24.9)  | 17.9 (14.8-20.9) |
| Nepal                                      | 22.2 (10.0-32.2) | 20.2 (16.3-23.9) |
| Netherlands                                | 24.3 (9.4-35.7)  | 29.4 (24.1-33.9) |
| New Zealand                                | 25.5 (12.6-37.0) | 29.1 (24.4-33.9) |
| Nicaragua                                  | 27.5 (12.0-41.2) | 26.4 (21.9-31.4) |
| Niger                                      | 16.6 (8.1-23.4)  | 16.9 (14.1-19.5) |
| Nigeria                                    | 15.3 (7.2-22.7)  | 15.0 (12.4-17.8) |
| Korea, Democratic People's Republic of     | 22.3 (8.4-34.0)  | 23.3 (18.8-27.6) |



## Supplementary data

|                                   |                  |                  |
|-----------------------------------|------------------|------------------|
| Norway                            | 23.1 (10.1-33.9) | 26.8 (22.2-31.2) |
| Oman                              | 21.9 (10.9-31.1) | 22.2 (18.1-26.3) |
| Pakistan                          | 28.4 (14.6-40.8) | 29.2 (24.6-34.2) |
| Palestine                         | 26.8 (10.0-38.5) | 28.9 (23.2-33.7) |
| Panama                            | 22.5 (9.5-33.3)  | 24.2 (20.0-28.4) |
| Papua New Guinea                  | 27.6 (11.9-38.7) | 26.5 (21.4-30.9) |
| Paraguay                          | 21.4 (9.1-31.7)  | 21.9 (17.7-25.9) |
| Peru                              | 22.0 (9.2-31.9)  | 23.6 (19.5-27.3) |
| Philippines                       | 26.0 (11.9-37.2) | 26.7 (22.1-31.1) |
| Poland                            | 27.9 (11.2-40.8) | 32.3 (26.1-37.8) |
| Portugal                          | 23.3 (7.7-35.3)  | 27.4 (22.1-32.0) |
| Qatar                             | 16.1 (7.8-23.3)  | 15.6 (12.5-18.7) |
| Romania                           | 27.5 (11.3-39.8) | 31.1 (25.3-36.1) |
| Russian Federation                | 27.0 (13.2-39.0) | 29.4 (24.2-34.4) |
| Rwanda                            | 17.3 (8.0-25.2)  | 16.1 (13.1-19.0) |
| Saint Lucia                       | 21.9 (9.6-32.5)  | 23.2 (18.9-27.4) |
| Saint Vincent and the Grenadines  | 22.8 (11.6-32.3) | 23.2 (19.0-27.2) |
| Samoa                             | 28.1 (13.3-40.1) | 28.1 (23.2-32.7) |
| Sao Tome and Principe             | 25.8 (12.9-37.6) | 24.0 (20.1-28.2) |
| Saudi Arabia                      | 23.1 (9.6-32.6)  | 23.3 (18.7-27.2) |
| Senegal                           | 18.2 (8.4-26.0)  | 18.3 (15.0-21.3) |
| Serbia                            | 25.4 (11.7-37.9) | 29.0 (23.9-34.1) |
| Seychelles                        | 23.5 (9.5-34.4)  | 24.4 (19.8-28.6) |
| Sierra Leone                      | 17.1 (9.7-24.9)  | 16.9 (14.4-20.0) |
| Singapore                         | 19.3 (6.4-29.9)  | 23.3 (18.6-27.7) |
| Slovakia                          | 28.8 (14.8-39.5) | 32.0 (26.7-36.5) |
| Slovenia                          | 26.6 (12.8-39.3) | 30.8 (25.7-36.2) |
| Solomon Islands                   | 24.6 (11.2-34.8) | 24.3 (19.8-28.5) |
| Somalia                           | 18.3 (7.9-26.5)  | 18.0 (14.5-21.3) |
| South Africa                      | 14.9 (6.6-21.1)  | 15.3 (12.4-17.8) |
| Korea, Republic of                | 16.9 (6.4-26.7)  | 21.4 (17.6-25.2) |
| South Sudan                       | 15.7 (6.0-22.6)  | 15.5 (12.3-18.1) |
| Spain                             | 22.9 (10.4-35.4) | 26.3 (22.0-31.2) |
| Sri Lanka                         | 27.9 (14.4-38.8) | 27.4 (22.7-31.7) |
| Sudan                             | 25.8 (12.8-36.5) | 25.9 (21.1-30.4) |
| Suriname                          | 21.3 (9.2-32.3)  | 22.3 (18.3-26.4) |
| Swaziland                         | 16.3 (8.1-22.7)  | 16.4 (13.5-18.9) |
| Sweden                            | 27.3 (11.4-40.8) | 31.5 (25.8-37.1) |
| Switzerland                       | 27.2 (12.9-39.6) | 31.9 (26.9-36.9) |
| Syrian Arab Republic              | 20.9 (10.8-29.5) | 20.6 (16.8-24.3) |
| Taiwan, Province of China         | 16.0 (6.0-25.1)  | 18.1 (14.6-21.7) |
| Tajikistan                        | 29.2 (14.1-41.3) | 29.7 (24.2-34.8) |
| Tanzania, United Republic of      | 17.2 (7.8-24.7)  | 16.8 (13.6-19.8) |
| Thailand                          | 20.8 (5.4-32.3)  | 24.1 (19.3-28.4) |
| Bahamas                           | 21.3 (8.5-31.4)  | 22.5 (17.9-26.7) |
| Gambia                            | 20.7 (9.7-29.5)  | 21.3 (17.5-24.8) |
| Timor-Leste                       | 24.6 (8.8-36.6)  | 26.1 (21.0-30.7) |
| Togo                              | 16.5 (7.4-24.6)  | 16.8 (13.7-20.0) |
| Tonga                             | 29.3 (14.7-41.6) | 29.8 (24.8-34.7) |
| Trinidad and Tobago               | 23.3 (11.7-33.1) | 22.7 (18.4-26.8) |
| Tunisia                           | 22.0 (10.5-32.9) | 22.6 (18.2-27.1) |
| Turkey                            | 20.5 (7.9-31.3)  | 21.9 (17.4-26.2) |
| Turkmenistan                      | 33.0 (16.6-46.3) | 33.3 (27.4-38.9) |
| Uganda                            | 14.8 (6.5-22.0)  | 14.5 (11.8-17.3) |
| Ukraine                           | 28.6 (13.5-40.4) | 29.8 (23.9-35.0) |
| United Arab Emirates              | 20.0 (8.3-29.1)  | 20.1 (15.8-23.9) |
| United Kingdom                    | 25.3 (11.6-37.5) | 29.4 (24.6-34.3) |
| United States                     | 25.8 (11.8-38.7) | 28.1 (23.1-33.3) |
| Uruguay                           | 25.5 (8.7-38.1)  | 29.6 (23.9-34.7) |
| Uzbekistan                        | 32.1 (17.7-44.0) | 31.4 (26.0-36.6) |
| Vanuatu                           | 29.0 (11.0-40.9) | 29.0 (23.0-33.7) |
| Venezuela, Bolivarian Republic of | 21.2 (9.3-29.9)  | 21.6 (17.5-25.0) |
| Viet Nam                          | 19.7 (5.4-30.4)  | 22.9 (18.2-26.9) |
| Yemen                             | 25.3 (14.3-35.2) | 25.9 (21.8-30.2) |

## Supplementary data

|          |                 |                  |
|----------|-----------------|------------------|
| Zambia   | 15.6 (7.5-22.4) | 15.2 (12.5-17.8) |
| Zimbabwe | 16.1 (8.3-22.2) | 16.1 (13.3-18.5) |

---

Abbreviation: PAF, population attributable fraction.

<sup>1</sup> Values were population attributable fractions (95% confidence interval) calculated based on comparison in Alternate Healthy Eating Index between global diet in 2017 and the reference healthy diet modified slightly from the target dietary pattern in the EAT-Lancet Commission Report (9).

<sup>2</sup> PAFs were calculated as the percentage of preventable total deaths in total deaths, including those due to infection and injury in the denominator.

<sup>3</sup> PAFs for total mortality were calculated based on the biological effects (risk ratios) for total deaths (deaths due to injury and infection excluded) from the Nurses' Health Study and the Health Professionals Follow-Up Study.

## Supplementary data

**Supplemental Table 6.** Percentage reductions in deaths as a result of improvements in the Alternate Healthy Eating Index from the current diet to the reference healthy die in men and women aged 25 years or older in 190 countries/ territories in 2017 in the sensitivity analysis using biological effects with further adjustment for body mass index. <sup>1</sup>

|                                  | Male                              | Female                            | Both sexes                           |
|----------------------------------|-----------------------------------|-----------------------------------|--------------------------------------|
| <b>Total deaths <sup>2</sup></b> |                                   |                                   |                                      |
| Preventable deaths               | 6,978,411 (5,768,476 - 8,100,019) | 6,155,713 (5,142,120 - 7,100,753) | 13,134,124 (10,910,597 - 15,200,773) |
| PAF (%)                          | 26.2 (21.7, 30.4)                 | 27.4 (22.9, 31.6)                 | 26.8 (22.2, 31.0)                    |
| <b>Total deaths <sup>3</sup></b> |                                   |                                   |                                      |
| Preventable deaths               | 6,380,068 (2,919,663 - 9,179,286) | 5,595,643 (2,522,637 - 8,067,102) | 11,975,711 (5,442,299 - 17,246,388)  |
| PAF (%)                          | 30.1 (13.8, 43.3)                 | 29.6 (13.4, 42.7)                 | 29.9 (13.6, 43.0)                    |
| <b>Cause-specific deaths</b>     |                                   |                                   |                                      |
| <b>Cancer</b>                    |                                   |                                   |                                      |
| Preventable deaths               | 1,210,648 (548,606 - 1,795,445)   | 567,139 (104,135 - 982,269)       | 1,257,752 (632,772 - 1,683,166)      |
| PAF (%)                          | 21.5 (9.7, 31.9)                  | 14.0 (2.6, 24.3)                  | 18.4 (6.7, 28.7)                     |
| <b>Coronary heart disease</b>    |                                   |                                   |                                      |
| Preventable deaths               | 1,878,810 (1,261,245 - 2,425,734) | 1,868,667 (1,240,652 - 2,410,745) | 3,747,476 (2,501,897 - 4,836,478)    |
| PAF (%)                          | 32.3 (21.7, 41.8)                 | 36.9 (24.5, 47.5)                 | 34.4 (23.0, 44.5)                    |
| <b>Stroke</b>                    |                                   |                                   |                                      |
| Preventable deaths               | 304,520 (-435,230 - 911,193)      | 683,834 (204,414 - 1,091,755)     | 988,354 (-230,817 - 2,002,948)       |
| PAF (%)                          | 9.7 (-13.9, 29.0)                 | 23.1 (6.9, 36.8)                  | 16.2 (-3.8, 32.8)                    |
| <b>Respiratory disease</b>       |                                   |                                   |                                      |
| Preventable deaths               | 964,393 (544,924 - 1,289,152)     | 975,823 (592,385 - 1,248,041)     | 1,940,217 (1,137,309 - 2,537,193)    |
| PAF (%)                          | 45.0 (25.5, 60.2)                 | 56.5 (34.3, 72.2)                 | 50.1 (29.4, 65.6)                    |
| <b>Neurodegenerative disease</b> |                                   |                                   |                                      |
| Preventable deaths               | 446,211 (247,771 - 604,154)       | 93,638 (-301,194 - 426,993)       | 539,849 (-53,422 - 1,031,147)        |
| PAF (%)                          | 42.0 (23.3, 56.9)                 | 5.2 (-16.7, 23.7)                 | 18.9 (-1.9, 36.0)                    |
| <b>Kidney disease</b>            |                                   |                                   |                                      |
| Preventable deaths               | 258,156 (-21,509 - 434,609)       | 276,591 (87 - 433,594)            | 534,746 (-21,422 - 868,204)          |
| PAF (%)                          | 40.8 (-3.4, 68.7)                 | 49.2 (0.0, 77.1)                  | 44.7 (-1.8, 72.7)                    |
| <b>Diabetes</b>                  |                                   |                                   |                                      |
| Preventable deaths               | 206,265 (126,597 - 275,809)       | 286,236 (231,689 - 335,270)       | 492,500 (358,286 - 611,079)          |
| PAF (%)                          | 31.6 (19.4, 42.3)                 | 40.7 (32.9, 47.6)                 | 36.3 (26.4, 45.1)                    |
| <b>Digestive system disease</b>  |                                   |                                   |                                      |
| Preventable deaths               | 806,709 (448,812 - 1,048,322)     | 451,042 (183,960 - 634,844)       | 1,257,752 (632,772 - 1,683,166)      |
| PAF (%)                          | 58.2 (32.4, 75.7)                 | 49.7 (20.3, 70.0)                 | 54.9 (27.6, 73.4)                    |
| <b>Injury (assumed)</b>          |                                   |                                   |                                      |
| Preventable deaths               | 0                                 | 0                                 | 0                                    |
| PAF (%)                          | 0                                 | 0                                 | 0                                    |
| <b>Infection (assumed)</b>       |                                   |                                   |                                      |
| Preventable deaths               | 0                                 | 0                                 | 0                                    |
| PAF (%)                          | 0                                 | 0                                 | 0                                    |
| <b>Other causes</b>              |                                   |                                   |                                      |
| Preventable deaths               | 304,357 (198,446 - 394,869)       | 392,673 (266,509 - 503,590)       | 697,030 (464,955 - 898,459)          |
| PAF (%)                          | 40.2 (26.2, 52.2)                 | 35.7 (24.2, 45.8)                 | 37.5 (25.0, 48.4)                    |

Abbreviation: PAF, population attributable fraction.

<sup>1</sup> Values were population attributable fractions (95% confidence interval) calculated based on comparison in Alternate Healthy Eating Index between global diet in 2017 and the reference healthy diet modified slightly from the target dietary pattern in the EAT-Lancet Commission Report (9).

<sup>2</sup> Total preventable deaths were calculated by summing up all the preventable cause-specific deaths. PAFs were calculated as the percentage of preventable total deaths in total deaths, including those due to infection and injury in the denominator.

<sup>3</sup> PAFs for total mortality were calculated based on the biological effects (risk ratios) for total deaths (deaths due to injury and infection excluded) from the Nurses' Health Study and the Health Professionals Follow-Up Study. Preventable total deaths were calculated by multiplying the total deaths (deaths due to injury and infection excluded) by the PAFs. The final PAFs for total mortality were calculated as the percentage of preventable total deaths in total deaths, including those due to infection and injury in the denominator.

Supplementary Data

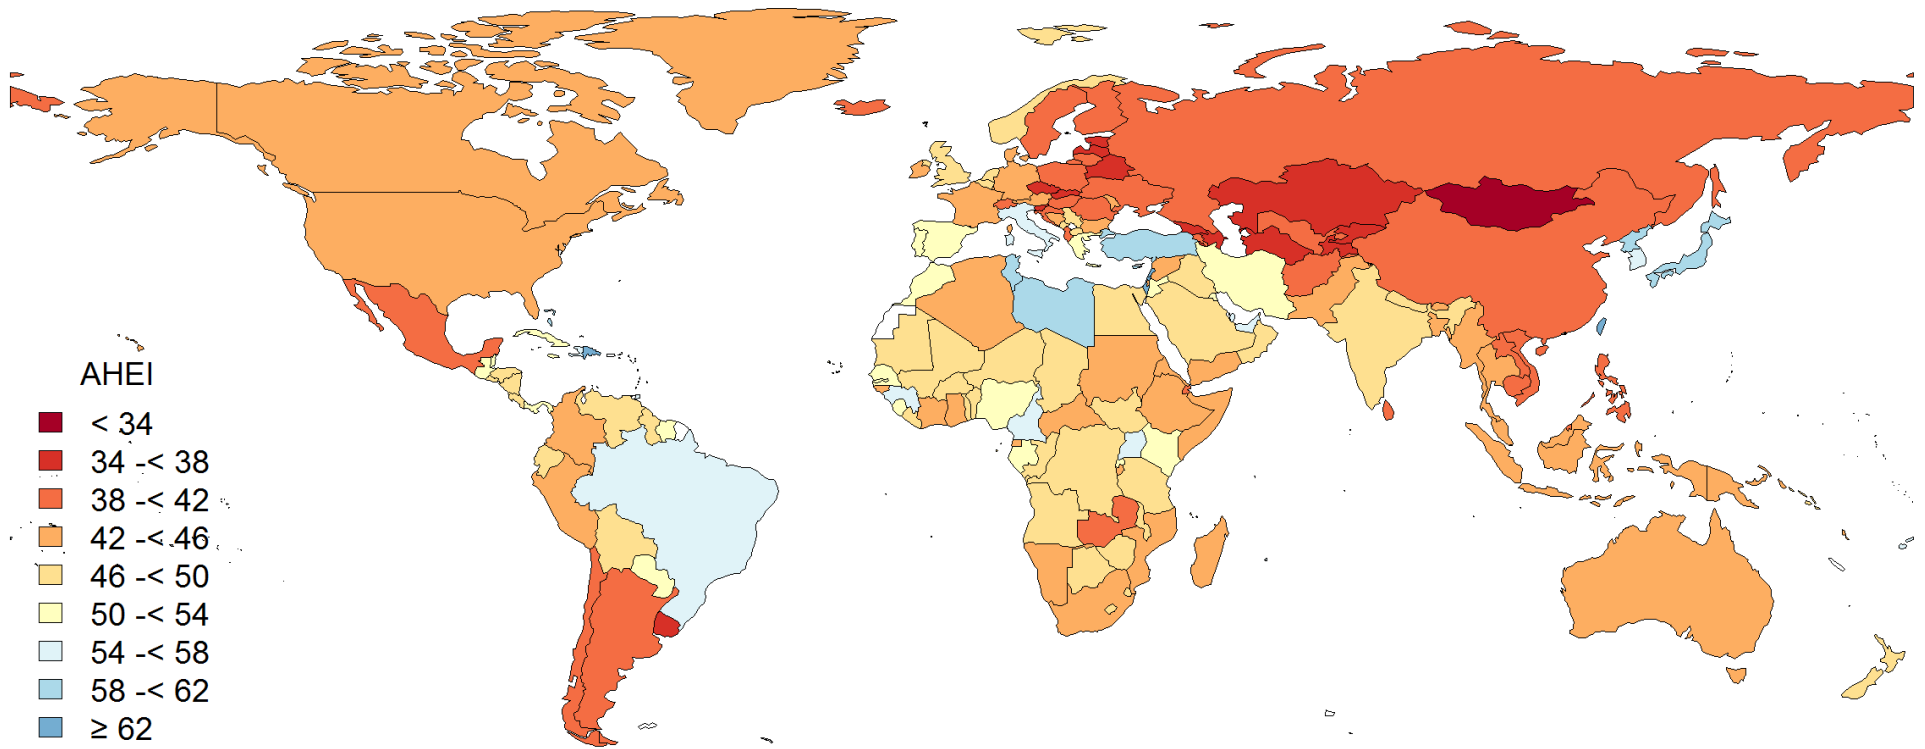

Supplemental Figure 1. Geographical distribution of Alternate Healthy Eating Index in men and women aged 25 years or older in 190 countries/ territories in 1990. White areas indicate that dietary data were not available. The Alternate Healthy Eating Index ranged from 0 (non-adherence) to 100 (perfect-adherence).

## Supplementary Data

### References

1. Bao Y, Bertola ML, Lenart EB, Stampfer MJ, Willett WC, Speizer FE, Chavarro JE. Origin, Methods, and Evolution of the Three Nurses' Health Studies. *American journal of public health*. 2016;106:1573-81.
2. Willett W. Chapter 5: Food Frequency Methods and Chapter 6: Reproducibility and Validity of Food-Frequency Questionnaires. *Nutritional epidemiology* Third ed: Oxford University Press; 2013.
3. HSPH. Harvard University Food Composition Table. [cited 2015 March 8th]; Available from: <https://regepi.bwh.harvard.edu/health/nutrition/>
4. Rose GA, Blackburn H, Gillum R, Prineas R. *Cardiovascular survey methods*: Geneva, Switzerland; WHO; 1982.
5. Walker A, Robins M, Weinfeld F. The National Survey of Stroke. Clinical findings. *Stroke; a journal of cerebral circulation*. 1981;12:113.
6. Group NDD. Classification and diagnosis of diabetes mellitus and other categories of glucose intolerance. *Diabetes*. 1979;28:1039-57.
7. Gavin III JR, Alberti K, Davidson MB, DeFronzo RA. Report of the expert committee on the diagnosis and classification of diabetes mellitus. *Diabetes Care*. 1997;20:1183.
8. Rich-Edwards JW, Corsano KA, Stampfer MJ. Test of the national death index and equifax nationwide death search. *American Journal of Epidemiology*. 1994;140:1016-9.
9. The EAT-Lancet Commission on Healthy Diets from Sustainable Food Systems. *Our Food in the Anthropocene*. *Lancet*. 2018.
